# Supplementary material for: Depolymerization of polydimethylsiloxanes in ammonia – a new approach to silicone recycling
Source: Royal Society of Chemistry journal article supplement (doi:10.1039/d4re00566j), 2025-01-01
Supplement: d4re00566j1.pdf [file d4re00566j1.pdf]

## Supporting information

### Depolymerization of polydimethylsiloxanes in ammonia – a new approach to silicone recycling

E.O. Minyaylo<sup>a,b</sup>, A.I. Kudryavtseva<sup>c</sup>, M.N. Temnikov<sup>a,b</sup>, A.S. Peregudov<sup>a</sup>, A.A. Anisimov<sup>a,b,c\*</sup>, A.M. Muzafarov<sup>a,d</sup>

<sup>a</sup> A. N. Nesmeyanov Institute of Organoelement Compounds, Russian Academy of Sciences, Moscow, Russia

<sup>b</sup> Tula State Lev Tolstoy Pedagogical University, 300026, Tula, Russia

<sup>c</sup> Moscow Center for Advanced Studies, 20 Kulakova Str., Moscow, Russia

<sup>d</sup> Enikolopov Institute of Synthetic Polymeric Materials, Russian Academy of Sciences, Moscow, Russia

### Table of contents

|                                                                                                                                                       |    |
|-------------------------------------------------------------------------------------------------------------------------------------------------------|----|
| <b>Experimental</b> .....                                                                                                                             | S3 |
| <i>General procedure for depolymerization of trimethylsiloxy terminated polydimethylsiloxane (PMS-200) in ammonia (samples 1-4)</i> .....             | S4 |
| <i>General procedure for depolymerization of silanol terminated polydimethylsiloxane (PDMS-(OH)<sub>2</sub>) in ammonia (sample 5)</i> .....          | S5 |
| <i>Synthesis of model silicone rubbers</i> .....                                                                                                      | S6 |
| <i>Synthesis of silicone rubber IIIa</i> .....                                                                                                        | S6 |
| <i>Synthesis of silicone rubber IIIb</i> .....                                                                                                        | S6 |
| <i>Synthesis of silicone rubber IIIc</i> .....                                                                                                        | S6 |
| <i>General procedure for depolymerization of silicone rubbers IIIa – IIIc and industrial silicone waste IVa – IVb in ammonia (samples 6-10)</i> ..... | S7 |
| <i>Isolation of reaction products 9-10</i> .....                                                                                                      | S7 |
| <i>General procedure for scaling up for depolymerization of industrial silicone waste IVa in ammonia (sample 11)</i> .....                            | S7 |
| <i>Preparation of polysiloxane by cationic polymerization of depolymerizate 2b (sample 12)</i> .....                                                  | S8 |

|                                                                                                    |     |
|----------------------------------------------------------------------------------------------------|-----|
| <i>Preparation of polysiloxane by anionic polymerization of depolymerizate 9 (sample 13)</i> ..... | S8  |
| <b>GC data</b> .....                                                                               | S9  |
| <b>SEC data</b> .....                                                                              | S28 |
| <b>NMR data</b> .....                                                                              | S37 |
| <b>Photo</b> .....                                                                                 | S43 |

## **Experimental**

Anhydrous ammonia was purchased from Spectra Gases Inc.

Trimethylsiloxy terminated polydimethylsiloxane (PMS-200), silanol terminated polydimethylsiloxane (PDMS-(OH)<sub>2</sub>), trimethylsiloxy terminated methylhydrosiloxane, K-18 catalyst (25 % solution of tin diethyldicaprylate in TEOS) were purchased from LLC “SILANE”.

Karstedt’s catalyst (a xylene solution of a platinum (0) complex with 1,3-divinyl-1,1,3,3-tetramethyldisiloxane, Pt ~2%) was purchased from Aldrich.

DMS-V25 was purchased from Gelest.

Chlorotrimethylsilane (TMSCl), Tetramethylammonium hydroxide (25% w/w in methanol), Amberlyst 15 were purchased from abcr GmbH.

Benzoyl peroxide was purchased from Acros.

Technical silicone rubber IVb – product of JSC “Polymer-Apparat”.

Water was deionised by deionizer MILLIPORE MILLI-Q SYNTHESIS.

<sup>29</sup>Si NMR spectra were recorded on a Bruker Avance™ 500 spectrometer (Germany) operating at 79 MHz. The chemical shifts for <sup>29</sup>Si were measured with TMS as an external standard.

SEC analysis was performed on a Shimadzu chromatograph using a RID - 20A refractometer as the detector, a PSS SDV analytical 10<sup>3</sup> Å column (Size 300 x 8 mm) and 10<sup>4</sup> Å column (Size 300 x 8 mm), and toluene as an eluent.

Gas chromatography (GC) analysis was performed on a chromatograph (Crystallux 4000, Russia) at 50–280 °C, 20° min<sup>-1</sup>; catharometer detector, columns (2 mm × 2 m) with 5% SE-30 stationary phase deposited onto Chromaton-N-AW-HMDS, helium as a carrier gas (30 mL min<sup>-1</sup>). Data were recorded and processed using the NetChrom 2.0 program package (Crystallux, Russia).

**General procedure for depolymerization of trimethylsiloxy terminated polydimethylsiloxane (PMS-200) in ammonia (samples 1-4)**

PMS-200 and required amount of H<sub>2</sub>O were loaded into an autoclave equipped with a magnetic stirrer, then the autoclave was filled with required amount of NH<sub>3</sub> under chill-down using an IN-FLOW mass flow meter (Bronkhorst, Netherlands). The reaction mixture was heated at T °C for t h and then decompressed. The depolymerization products were obtained as transparent viscous liquids. Reagent loads, temperature and duration of synthesis are shown in Table S1. The products obtained were isolated in quantitative yields. The yield of HMDS was calculated using the M<sub>n</sub><sup>NMR</sup> (Fig S34) of the initial PMS for depolymerizates that do not contain a high molecular weight fraction.

Table S1.

| <b>№</b>  | <b>m(PMS-200),<br/>g</b> | <b>PMS-200,<br/>mmol</b> | <b>V(H<sub>2</sub>O), mL</b> | <b>H<sub>2</sub>O, mmol</b> | <b>m(NH<sub>3</sub>), g</b> | <b>T, °C</b> | <b>t, hours</b> | <b>HMDS<br/>yield, %</b> |
|-----------|--------------------------|--------------------------|------------------------------|-----------------------------|-----------------------------|--------------|-----------------|--------------------------|
| <b>1a</b> | 1                        | 14                       | 1                            | 56                          | 5                           | 150          | 24              | 83.7                     |
| <b>1b</b> | 1                        | 14                       | 1                            | 56                          | 5                           | 150          | 12              | 91.6                     |
| <b>1c</b> | 1                        | 14                       | 1                            | 56                          | 5                           | 150          | 10              | -                        |
| <b>1d</b> | 1                        | 14                       | 1                            | 56                          | 5                           | 150          | 8               | -                        |
| <b>1e</b> | 1                        | 14                       | 1                            | 56                          | 5                           | 150          | 6               | -                        |
| <b>2a</b> | 1                        | 14                       | 0.5                          | 28                          | 5                           | 150          | 24              | 84.2                     |
| <b>2b</b> | 1                        | 14                       | 0.25                         | 14                          | 5                           | 150          | 24              | 69.5                     |
| <b>2c</b> | 1                        | 14                       | 0.1                          | 5.5                         | 5                           | 150          | 24              | -                        |
| <b>2d</b> | 1                        | 14                       | 0                            | 0                           | 5                           | 150          | 24              | -                        |
| <b>3a</b> | 1                        | 14                       | 0.5                          | 28                          | 4                           | 150          | 24              | 42.1                     |
| <b>3b</b> | 1                        | 14                       | 0.5                          | 28                          | 3                           | 150          | 24              | -                        |
| <b>3c</b> | 1                        | 14                       | 0.25                         | 14                          | 4                           | 150          | 24              | 75.8                     |
| <b>3d</b> | 1                        | 14                       | 0.25                         | 14                          | 3                           | 150          | 24              | -                        |
| <b>4a</b> | 1                        | 14                       | 1                            | 56                          | 5                           | 50           | 48              | -                        |
| <b>4b</b> | 1                        | 14                       | 1                            | 56                          | 5                           | 125          | 24              | -                        |
| <b>4c</b> | 1                        | 14                       | 1                            | 56                          | 5                           | 125          | 48              | -                        |

**General procedure for depolymerization of silanol terminated polydimethylsiloxane (PDMS-(OH)<sub>2</sub>) in ammonia (sample 5)**

PDMS-(OH)<sub>2</sub> and required amount of H<sub>2</sub>O were loaded into an autoclave equipped with a magnetic stirrer, then the autoclave was filled with 5 g of NH<sub>3</sub> under chill-down using an IN-FLOW mass flow meter (Bronkhorst, Netherlands). The reaction mixture was heated at 150°C for 24 h and then decompressed. The depolymerization products were obtained as transparent viscous liquids. Reagent loads are shown in Table S2. The products obtained were isolated in quantitative yields.

Table S2.

| <b>№</b>  | <b>m(PDMS-(OH)<sub>2</sub>), g</b> | <b>PDMS-(OH)<sub>2</sub>, mmol</b> | <b>V(H<sub>2</sub>O), ml</b> | <b>H<sub>2</sub>O, mmol</b> | <b>m(NH<sub>3</sub>), g</b> | <b>T, °C</b> | <b>t, hours</b> |
|-----------|------------------------------------|------------------------------------|------------------------------|-----------------------------|-----------------------------|--------------|-----------------|
| <b>5</b>  | 1                                  | 14                                 | 0.25                         | 14                          | 5                           | 150          | 24              |
| <b>5a</b> | 1                                  | 14                                 | 1                            | 56                          | 5                           | 150          | 24              |
| <b>5b</b> | 1                                  | 14                                 | 0.5                          | 28                          | 5                           | 150          | 24              |
| <b>5c</b> | 1                                  | 14                                 | 0.1                          | 5.5                         | 5                           | 150          | 24              |
| <b>5d</b> | 1                                  | 14                                 | 0                            | 0                           | 5                           | 150          | 24              |

### ***Synthesis of model silicone rubbers***

#### ***Synthesis of silicone rubber IIIa***

20  $\mu$ L of Karstedt's catalyst was placed added to a vial containing 9.1 g (0.5 mmol) of DMS-V25. This mixture was then quickly added to the 30 % solution of 10 g (1 mmol) of methylhydrosiloxane in toluene, stirred, and poured into a PTFE mold to cure. After evaporation of the solvent, the silicone rubber IIIa was heated at 80 °C/1 mbar. The transparent cross-linked material was obtained, the gel fraction was 98%.

#### ***Synthesis of silicone rubber IIIb***

The mixture of 50 % solution of 10 g (0.14 mmol (calculated for dimethylsiloxane unit)) of silanol terminated polydimethylsiloxane PDMS-(OH)<sub>2</sub> in toluene and 1 mL of K-18 was poured into a PTFE mold to cure. After evaporation of the solvent, the silicone rubber IIIb was heated at 80 °C/1 mbar. The transparent cross-linked material was obtained, the gel fraction was 93%.

#### ***Synthesis of silicone rubber IIIc***

The mixture of 10 g (0.14 mmol (calculated for dimethylsiloxane unit)) of silanol terminated polydimethylsiloxane PDMS-(OH)<sub>2</sub> and 0.1 g (1 wt. %) of benzoyl peroxide was poured into a PTFE mold to cure in a circulating air oven at 150° C for 24 hours. The transparent cross-linked material was obtained, the gel fraction was 62%.

***General procedure for depolymerization of silicone rubbers IIIa – IIIc and industrial silicone waste IVa – IVb in ammonia (samples 6-10)***

1 g of silicone and 0.25 mL (14 mmol) of H<sub>2</sub>O were loaded into an autoclave equipped with a magnetic stirrer, then the autoclave was filled with 5 g of NH<sub>3</sub> under chill-down using an IN-FLOW mass flow meter (Bronkhorst, Netherlands). The reaction mixture was heated at 150°C for 24 h and then decompressed. The depolymerization products were obtained as transparent viscous liquids in case of samples 6-8 and as paste in case of samples 9-10.

***Isolation of reaction products 9-10***

The mixtures of low molecular weight products obtained in experiments **8** and **9** were separated from the fillers by centrifugation in pentane solution. The solutions obtained were further decanted. The solvent was distilled off on a rotary vacuum evaporator at 50 °C/850 mbar. The filler was evacuated at rt/2 mbar. The filler content of the original sample was 25% in the case of IVa and 50% in the case of IVb. The product mass of 8 after isolation was 0.68 g, the yield was 91 %. The product mass of 9 after isolation was 0.45 g, the yield was 90 %.

***General procedure for scaling up for depolymerization of industrial silicone waste IVa in ammonia (sample 11)***

4.25 g of IVa and 1.06 mL (59 mmol) H<sub>2</sub>O were loaded into an autoclave equipped with a mechanical stirrer, then the autoclave was filled with 21.25 g of NH<sub>3</sub> under chilldown using an IN-FLOW mass flow meter. The reaction mixture was heated at 150°C for 24 h and then decompressed. The depolymerization product was obtained as white paste. Then the sample 11 was separated from the fillers by centrifugation in pentane solution. The solution obtained was further decanted. The solvent was distilled off on a rotary vacuum evaporator at 50 °C/850 mbar. The product mass after isolation was 2.98 g, the yield was 93 %.

**Preparation of polysiloxane by cationic polymerization of depolymerizate 2b (sample 12)**

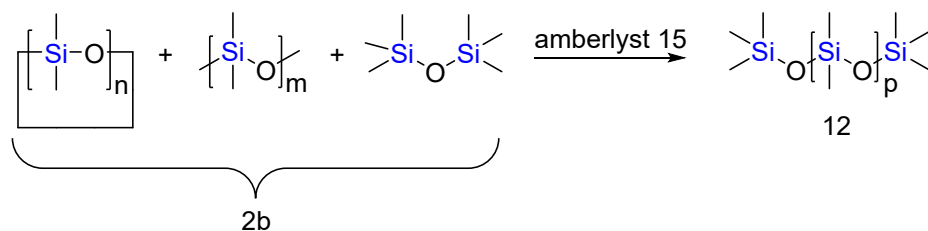

A flask equipped with a magnetic stirrer was loaded with 3.09 g (41.76 mmol) of 2b and 0.062 g (2 wt%) of Amberlyst 15. The mixture was stirred for 8 hours at a temperature of 80 °C. Then the reaction mixture was dissolved in hexane. Amberlyst 15 was removed by filtration through a folded filter in a hexane solution. The solvent was distilled off on a rotary vacuum evaporator at 50 °C/360 mbar. Final polymer was analyzed by SEC.

**Preparation of polysiloxane by anionic polymerization of depolymerizate 9 (sample 13)**

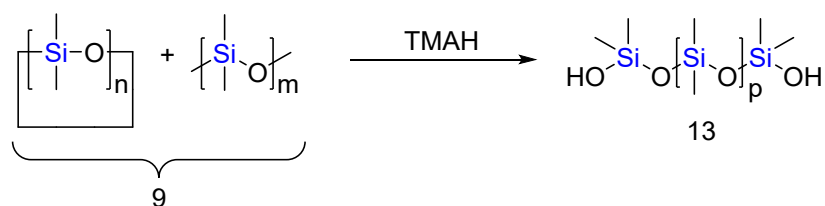

A test tube equipped with a magnetic stirrer was loaded with 0.18 g (2.5 mmol) of 9, 7  $\mu$ L (0.018 mmol) of TMAH (25% w/w in methanol) and 0.2 mL of dry toluene. The mixture was stirred at 100 °C for 20 h under argon conditions. Then 0.0019 g (0.018 mmol) of TMSCl was added. Furthermore, the mixture was stirred at 100 °C for 2 h. Final polymer was analyzed by SEC.



## GC data

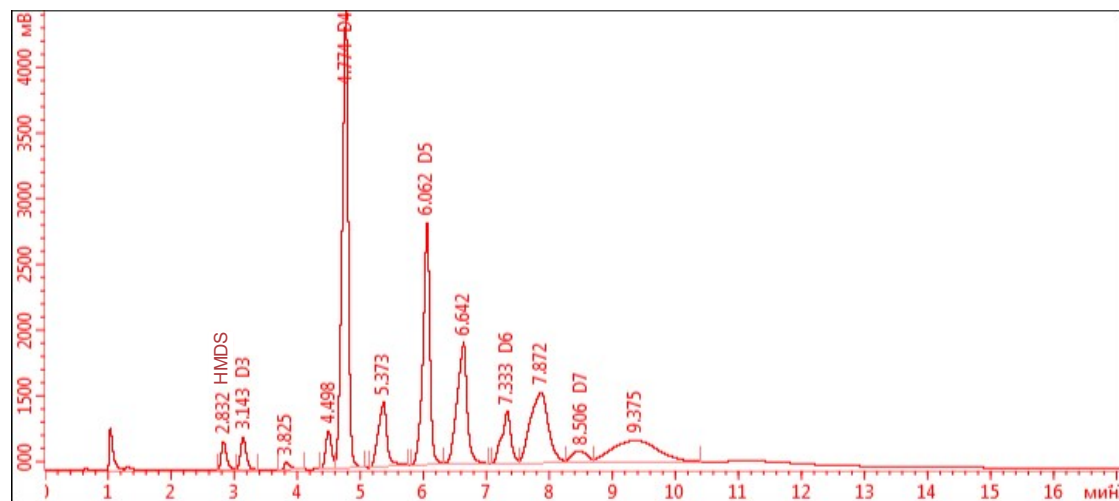

Fig S1. GC spectra of **1a**

| Component | Time, min | Concentration, % | Area      |
|-----------|-----------|------------------|-----------|
| HMDS      | 2.832     | 1.5957           | 1304.181  |
| D3        | 3.143     | 1.9337           | 1580.432  |
| L3        | 3.825     | 0.49096          | 401.261   |
| L4        | 4.498     | 2.2279           | 1820.875  |
| D4        | 4.774     | 28.917           | 23634.041 |
| L4        | 5.373     | 5.7101           | 4666.888  |
| D5        | 6.062     | 16.899           | 13811.166 |
| L5        | 6.642     | 12.357           | 10099.293 |
| D6        | 7.333     | 4.9375           | 4035.459  |
| L6        | 7.872     | 12.97            | 10600.470 |
| D7        | 8.506     | 1.8587           | 1519.108  |
| L7        | 9.375     | 10.103           | 8256.820  |

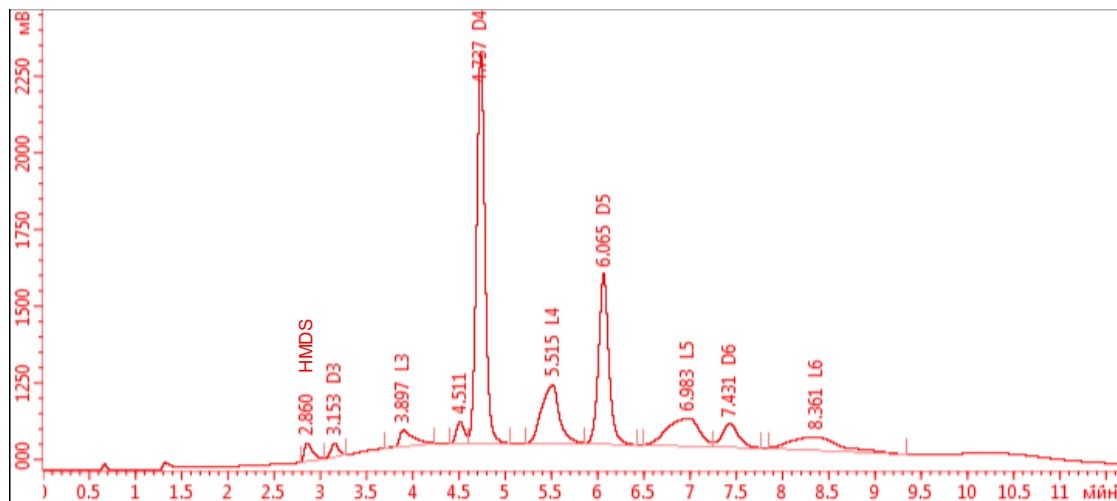

Fig S2. GC spectra of **1b**

| Component | Time, min | Concentration, % | Area     |
|-----------|-----------|------------------|----------|
| HMDS      | 2.860     | 1.7382           | 372.331  |
| D3        | 3.153     | 1.1199           | 239.875  |
| L3        | 3.897     | 2.5349           | 542.989  |
|           | 4.511     | 2.052            | 439.534  |
| D4        | 4.737     | 38.171           | 8176.395 |
| L4        | 5.515     | 12.281           | 2630.647 |
| D5        | 6.065     | 20.222           | 4331.549 |
| L5        | 6.983     | 10.092           | 2161.788 |
| D6        | 7.431     | 4.419            | 946.553  |
| L6        | 8.361     | 7.3697           | 1578.617 |

| Component | Time, min | Concentration, % | Area      |
|-----------|-----------|------------------|-----------|
|           | 1.289     | 0.52896          | 191.318   |
| HMDS      | 2.841     | 1.6525           | 597.679   |
| D3        | 3.154     | 1.6572           | 599.396   |
| L3        | 3.828     | 3.0322           | 1096.718  |
|           | 4.491     | 1.8424           | 666.375   |
| D4        | 4.741     | 36.272           | 13119.221 |
| L4        | 5.355     | 11.924           | 4312.801  |
| D5        | 6.027     | 14.539           | 5258.558  |
| L5        | 6.523     | 10.816           | 3912.176  |
|           | 7.186     | 1.1334           | 409.955   |
| D6        | 7.307     | 2.1165           | 765.509   |
| L6        | 7.622     | 7.5182           | 2719.253  |
| D7        | 8.339     | 1.345            | 486.476   |

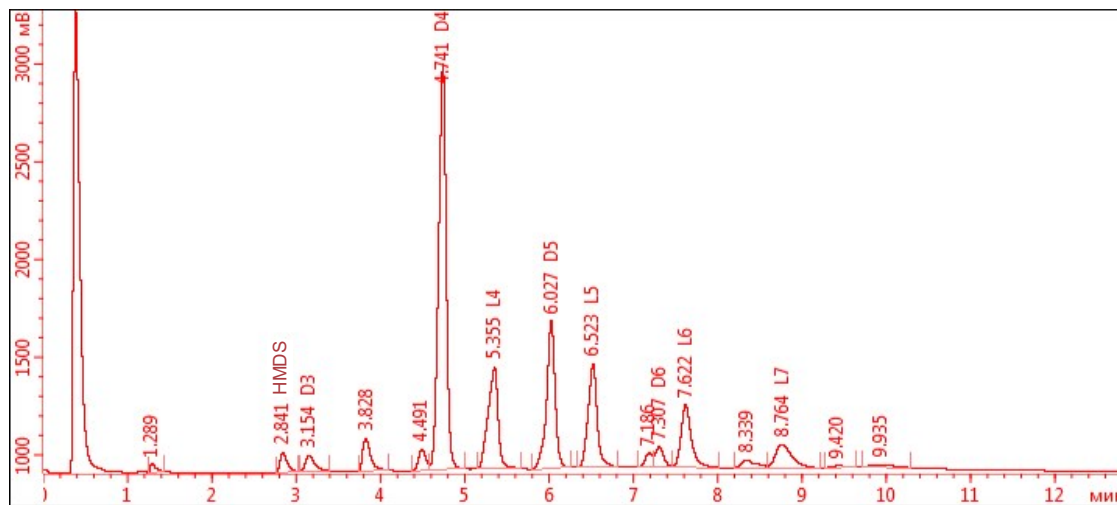

|    |       |         |          |
|----|-------|---------|----------|
| L7 | 8.764 | 4.6103  | 1667.494 |
| D8 | 9.420 | 0.3312  | 119.792  |
| L8 | 9.935 | 0.68096 | 246.298  |

Fig S3. GC spectra of 1c

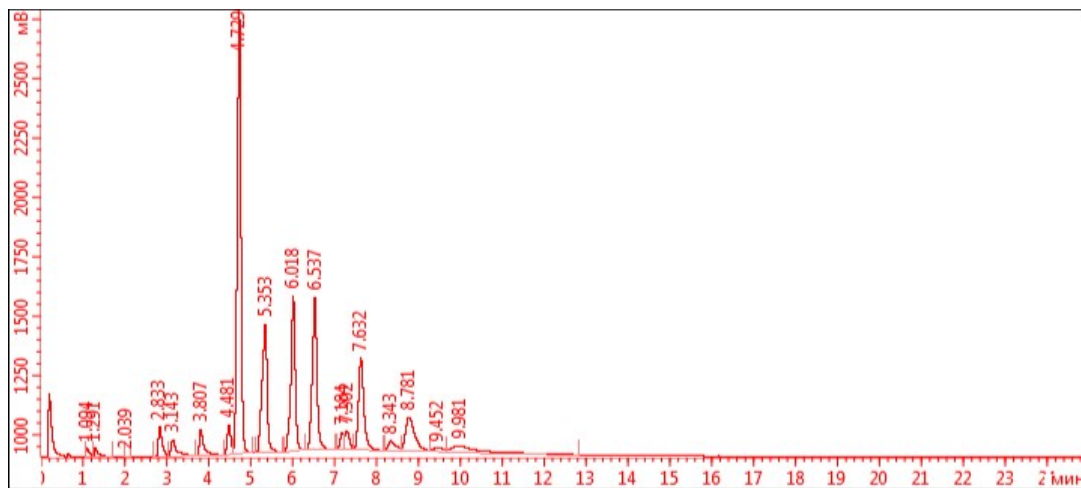

Fig S4. GC spectra of **1d**

| Component | Time, min | Concentration, % | Area      |
|-----------|-----------|------------------|-----------|
|           | 1.291     | 0.6473           | 246.171   |
|           | 2.039     | 0.0095477        | 3.631     |
| HMDS      | 2.833     | 2.1773           | 828.041   |
| D3        | 3.143     | 1.8592           | 707.057   |
| L3        | 3.807     | 2.1766           | 827.761   |
|           | 4.481     | 1.9459           | 740.030   |
| D4        | 4.729     | 30.693           | 11672.733 |
| L4        | 5.353     | 12.106           | 4604.116  |
| D5        | 6.018     | 12.387           | 4710.700  |
| L5        | 6.537     | 13.316           | 5063.920  |
|           | 7.184     | 1.1359           | 431.976   |
| D6        | 7.302     | 1.5673           | 596.046   |
| L6        | 7.632     | 9.1947           | 3496.774  |
| D7        | 8.343     | 1.2489           | 474.968   |
| L7        | 8.781     | 5.8247           | 2215.158  |
|           | 9.452     | 0.75781          | 288.197   |
|           | 9.981     | 2.9527           | 1122.918  |
|           | 0.661     | 0.24052          | 91.599    |
|           | 1.350     | 0.18552          | 70.654    |
| HMDS      | 2.841     | 2.4663           | 939.248   |
| D3        | 3.152     | 3.7153           | 1414.925  |
| L3        | 4.503     | 3.2202           | 1226.366  |
| D4        | 4.757     | 38.516           | 14668.258 |
| L4        | 5.325     | 4.0871           | 1556.528  |
| D5        | 6.045     | 12.259           | 4668.833  |
| L5        | 6.647     | 9.9183           | 3777.271  |

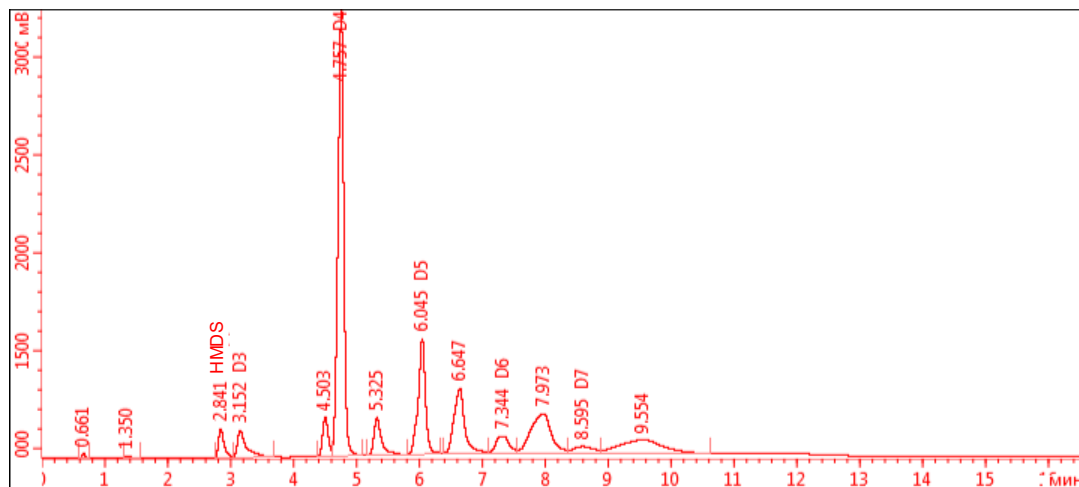

Fig S5. GC spectra of **1e**

|    |       |        |          |
|----|-------|--------|----------|
| D6 | 7.344 | 3.2685 | 1244.764 |
| L6 | 7.973 | 11.72  | 4463.323 |
| D7 | 8.595 | 1.9349 | 736.888  |
| L7 | 9.554 | 8.4688 | 3225.247 |
| D9 | 0.000 | 0      | 0.000    |
| L9 | 0.000 | 0      | 0.000    |

| Component | Time, | Concentration, | Area |
|-----------|-------|----------------|------|
|-----------|-------|----------------|------|

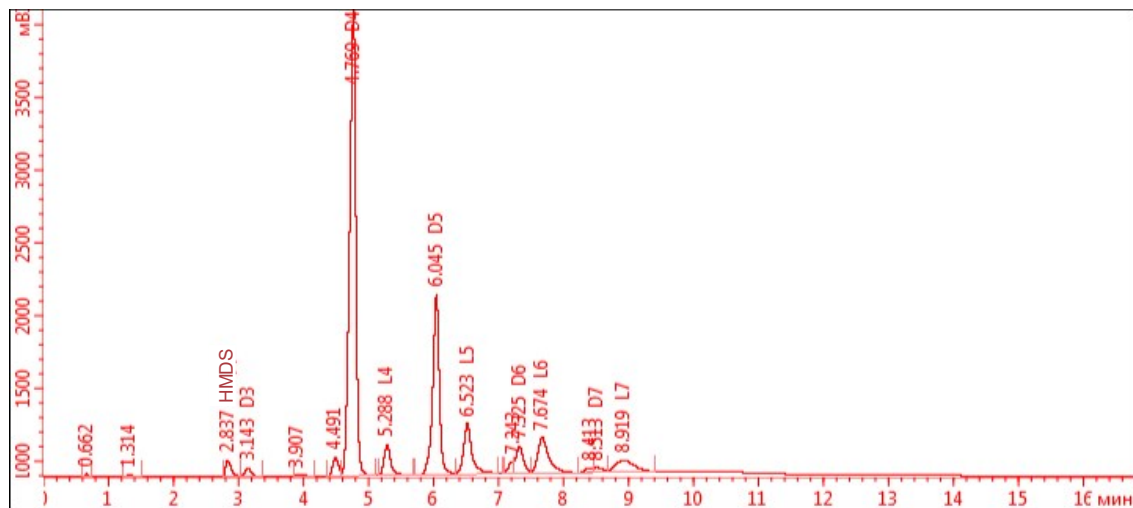

Fig S6. GC spectra of **2a**

|      | min   | %       |           |
|------|-------|---------|-----------|
|      | 0.662 | 0.16459 | 72.149    |
|      | 1.314 | 0.22871 | 100.259   |
| HMDS | 2.837 | 1.6025  | 702.466   |
| D3   | 3.143 | 0.87898 | 385.314   |
| L3   | 3.907 | 0.2294  | 100.562   |
|      | 4.491 | 1.7835  | 781.817   |
| D4   | 4.769 | 48.784  | 21385.077 |
| L4   | 5.288 | 3.5038  | 1535.924  |
| D5   | 6.045 | 20.138  | 8827.840  |
| L5   | 6.523 | 6.8568  | 3005.755  |
|      | 7.243 | 0.96565 | 423.305   |
| D6   | 7.325 | 3.2529  | 1425.943  |
| L6   | 7.674 | 6.4802  | 2840.667  |
|      | 8.413 | 0.56874 | 249.316   |
| D7   | 8.513 | 0.75028 | 328.897   |
| L7   | 8.919 | 3.812   | 1671.040  |

| Component | Time, min | Concentration, % | Area      |
|-----------|-----------|------------------|-----------|
|           | 0.261     | 0.16215          | 56.459    |
|           | 0.703     | 0.84345          | 293.679   |
|           | 1.322     | 0.10893          | 37.927    |
| HMDS      | 2.844     | 1.3246           | 461.225   |
| D3        | 3.147     | 0.75743          | 263.726   |
| L3        | 4.490     | 1.6199           | 564.045   |
| D4        | 4.768     | 61.784           | 21512.395 |
| L4        | 5.262     | 2.5899           | 901.771   |
| D5        | 6.027     | 14.997           | 5221.836  |
| L5        | 6.487     | 4.8135           | 1675.985  |
|           | 7.189     | 1.0959           | 381.570   |

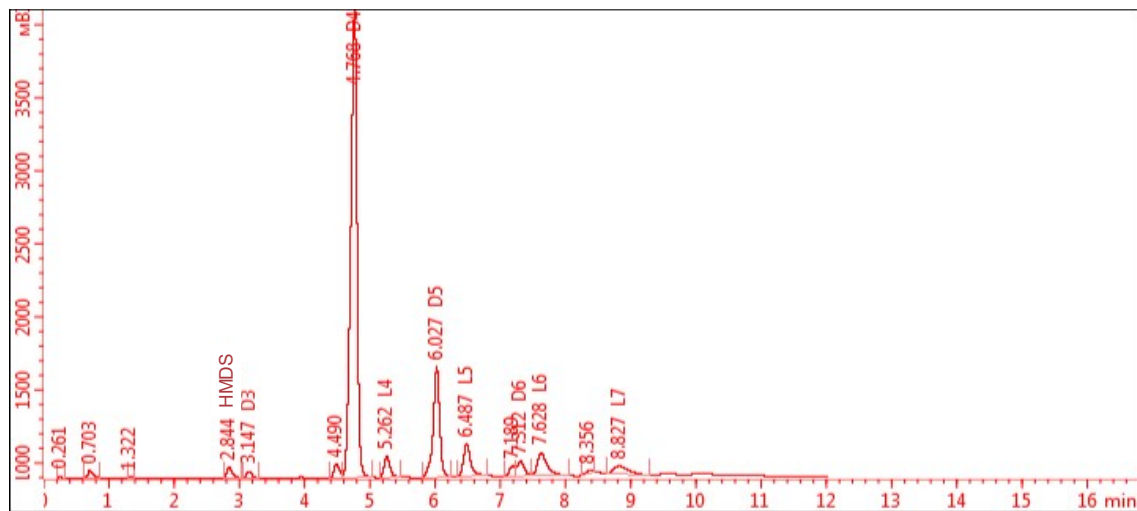

Fig S7. GC spectra of **2b**

|    |       |         |          |
|----|-------|---------|----------|
| D6 | 7.312 | 2.1856  | 760.981  |
| L6 | 7.628 | 4.7238  | 1644.782 |
| D7 | 8.356 | 0.33857 | 117.887  |
| L7 | 8.827 | 2.655   | 924.439  |

| Component | Time, min | Concentration, % | Area      |
|-----------|-----------|------------------|-----------|
| HMDS      | 2,823     | 0,942            | 107,885   |
| D3        | 3,147     | 5,097            | 583,767   |
|           | 4,462     | 2,119            | 242,628   |
| D4        | 4,720     | 61,784           | 21512,395 |
|           | 5,897     | 1,473            | 168,671   |
| D5        | 6,009     | 11,655           | 1334,770  |
| L5        | 6,410     | 1,021            | 116,931   |
|           | 7,168     | 1,941            | 222,274   |
| D6        | 7,307     | 2,063            | 236,283   |

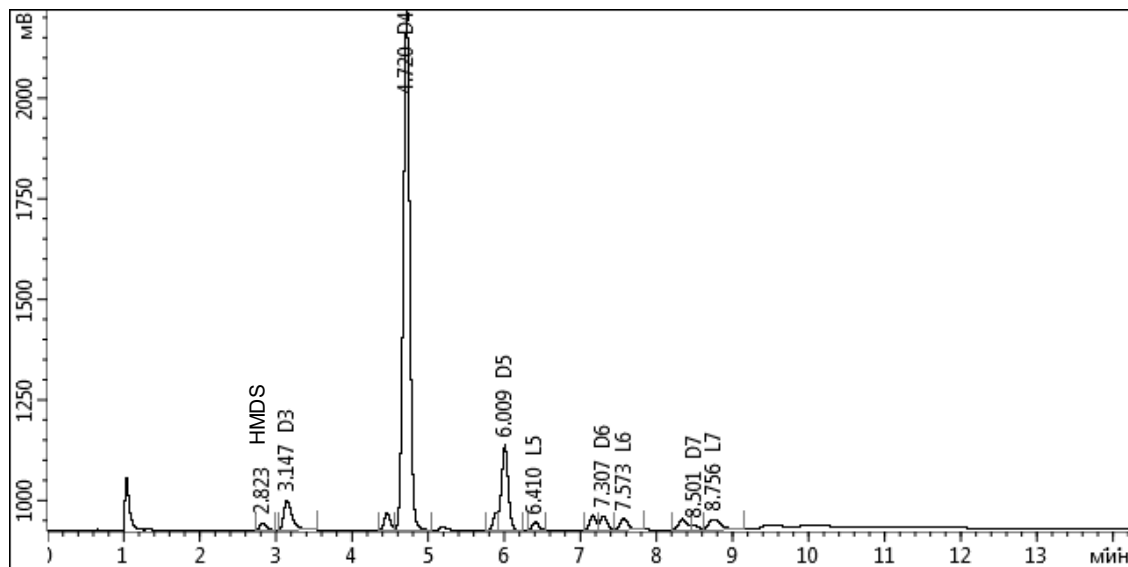

Fig S8. GC spectra of 2c

|    |       |       |         |
|----|-------|-------|---------|
| L6 | 7,573 | 1,810 | 207,288 |
|    | 8,343 | 1,891 | 216,517 |
| D7 | 8,501 | 0,619 | 70,935  |
| L7 | 8,756 | 2,590 | 296,599 |

| Component | Time, min | Concentration, % | Area     |
|-----------|-----------|------------------|----------|
| HMDS      | 2,809     | 0,798            | 173,614  |
| D3        | 3,135     | 0,902            | 196,292  |
| L3        | 3,712     | 2,019            | 439,163  |
|           | 4,458     | 2,014            | 437,959  |
| D4        | 4,710     | 27,606           | 6004,355 |
|           | 5,253     | 8,461            | 1840,183 |
| D5        | 5,925     | 1,359            | 295,498  |
| L5        | 6,025     | 19,832           | 4313,418 |
|           | 6,513     | 14,065           | 3059,057 |
| D6        | 7,194     | 1,417            | 308,174  |
| L6        | 7,325     | 4,399            | 956,749  |



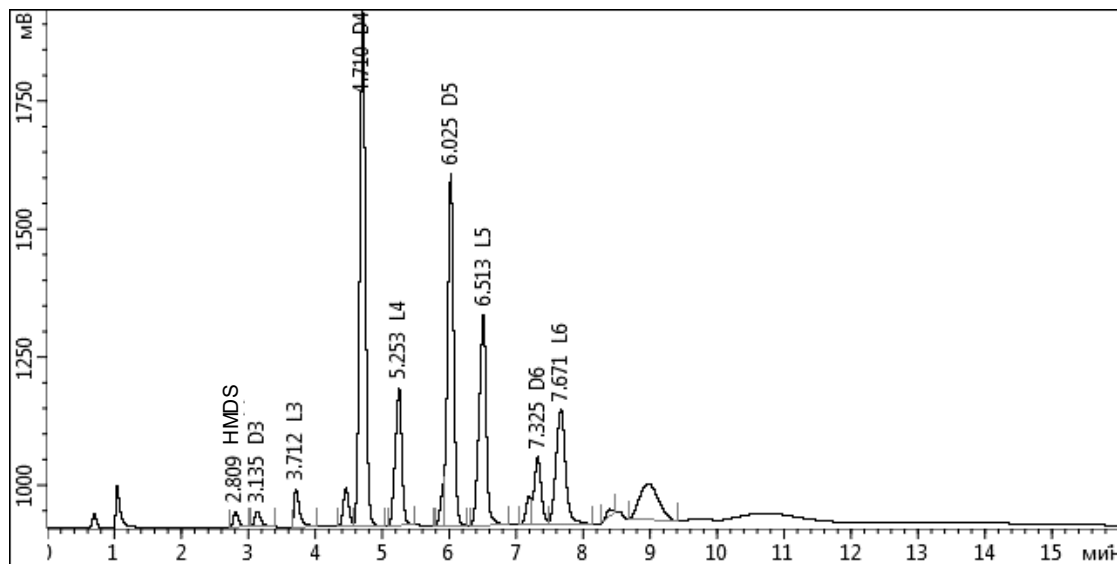

Fig S9. GC spectra of **3a**

|    |       |       |         |
|----|-------|-------|---------|
| D7 | 8,390 | 0,397 | 86,370  |
| L7 | 8,756 | 2,590 | 296,599 |

| Component | Time, | Concentration. % | Area |
|-----------|-------|------------------|------|
|           |       |                  | S17  |

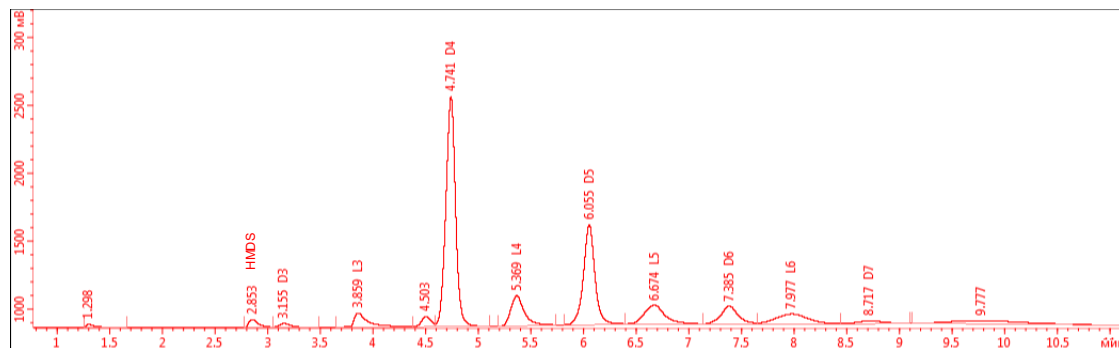

Fig S10. GC spectra of **3b**

| Component | Time, min | Concentration, % | Area      |
|-----------|-----------|------------------|-----------|
|           | 1.298     | 0.65718          | 181.421   |
| HMDS      | 2.853     | 1.4691           | 405.574   |
| D3        | 3.155     | 0.92414          | 255.118   |
| L3        | 3.859     | 3.7068           | 1023.292  |
|           | 4.503     | 1.715            | 473.455   |
| D4        | 4.741     | 39.308           | 10851.401 |
| L4        | 5.369     | 7.0388           | 1943.141  |
| D5        | 6.055     | 20.291           | 5601.632  |
| L5        | 6.674     | 7.3494           | 2028.877  |
| D6        | 7.385     | 5.6155           | 1550.209  |
| L6        | 7.977     | 5.6737           | 1566.293  |
| D7        | 8.717     | 1.3389           | 369.621   |
| L7        | 0.000     | 2,590            | 0.000     |
| D9        | 0.000     | 0                | 0.000     |
|           | 9.777     | 0                | 1356.068  |
|           | 0.000     | 0.000            | 0.000     |
|           | 0.000     | 0.000            | 0.000     |
| HMDS      | 2.842     | 1.44             | 887.372   |
| D3        | 3.151     | 1.0844           | 668.264   |
| L3        | 3.911     | 0.14015          | 86.370    |
|           | 4.501     | 1.5571           | 959.581   |
| D4        | 4.802     | 52.035           | 32066.629 |
| L4        | 5.303     | 2.7816           | 1714.147  |
| D5        | 6.061     | 18.702           | 11524.913 |
| L5        | 6.525     | 5.1013           | 3143.674  |
|           | 7.205     | 1.1179           | 688.905   |
| D6        | 7.328     | 2.9107           | 1793.737  |
| L6        | 7.660     | 5.3622           | 3304.455  |
| D7        | 8.386     | 1.765            | 1087.652  |
| L7        | 8.879     | 4.2981           | 2648.662  |

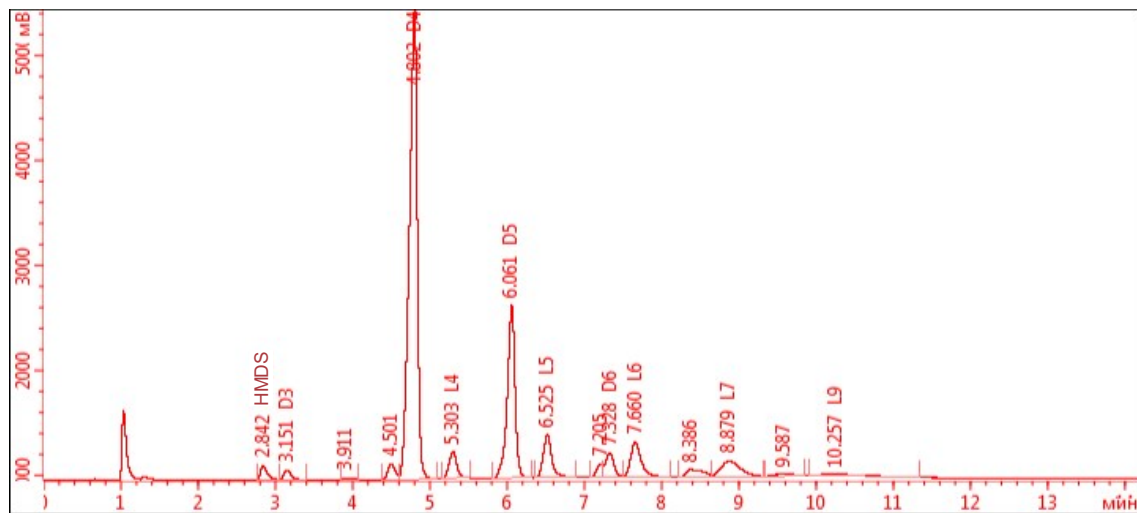

Fig S11. GC spectra of **3c**

L9      10.257      1.1816      728.145

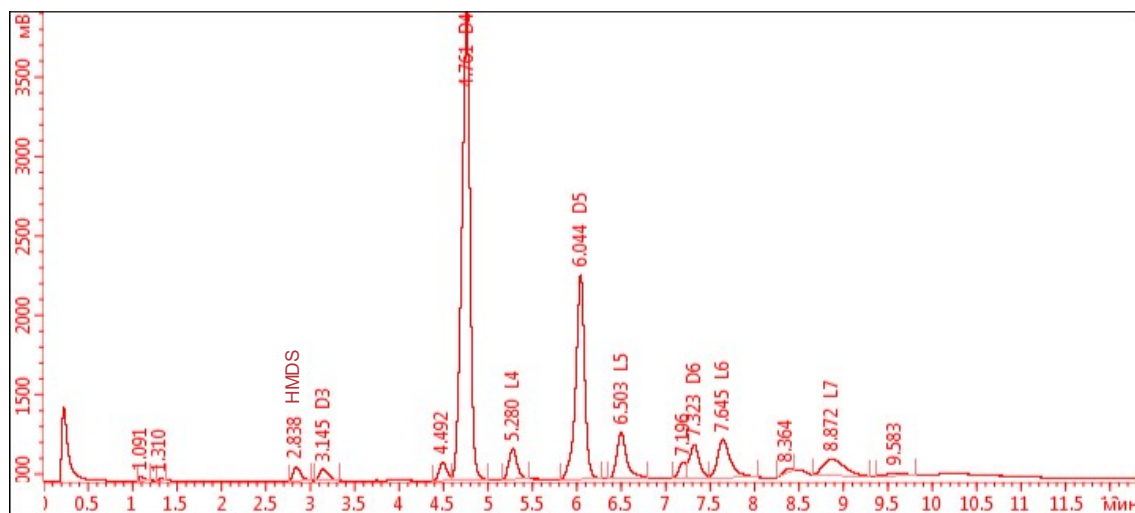

Fig S12. GC spectra of **3d**

| Component | Time, min | Concentration, % | Area      |
|-----------|-----------|------------------|-----------|
|           | 1.091     | 0.28795          | 115.430   |
|           | 1.310     | 0.10007          | 40.115    |
| HMDS      | 2.838     | 1.367            | 547.975   |
| D3        | 3.145     | 1.1899           | 477.014   |
|           | 4.492     | 1.7154           | 687.669   |
| D4        | 4.761     | 48.08            | 19273.910 |
| L4        | 5.280     | 3.1375           | 1257.755  |
| D5        | 6.044     | 22.307           | 8942.200  |
| L5        | 6.503     | 5.467            | 2191.576  |
|           | 7.196     | 1.2498           | 501.020   |
| D6        | 7.323     | 4.015            | 1609.483  |
| L6        | 7.645     | 5.9734           | 2394.554  |
| D7        | 8.364     | 0.40542          | 162.522   |
| L7        | 8.872     | 4.1705           | 1671.837  |
|           | 9.583     | 0.53424          | 214.160   |

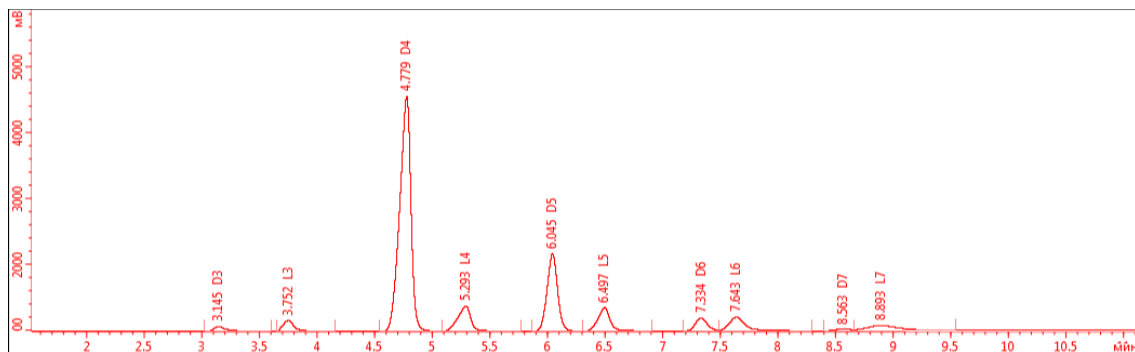

Fig S13. GC spectra of 5

| Component | Time, min | Concentration, % | Area      |
|-----------|-----------|------------------|-----------|
| D3        | 3.145     | 1.3586           | 602.431   |
| L3        | 3.752     | 2.5069           | 1111.585  |
| D4        | 4.779     | 54.8             | 24299.326 |
| L4        | 5.293     | 6.8272           | 3027.310  |
| D5        | 6.045     | 16.807           | 7452.533  |
| L5        | 6.497     | 5.835            | 2587.350  |
| D6        | 7.334     | 3.1766           | 1408.551  |
| L6        | 7.643     | 4.5733           | 2027.865  |
| D7        | 8.563     | 0.54608          | 242.140   |
| L7        | 8.893     | 3.5693           | 1582.687  |

| Component | Time, | Concentration. % | Area |
|-----------|-------|------------------|------|
|-----------|-------|------------------|------|

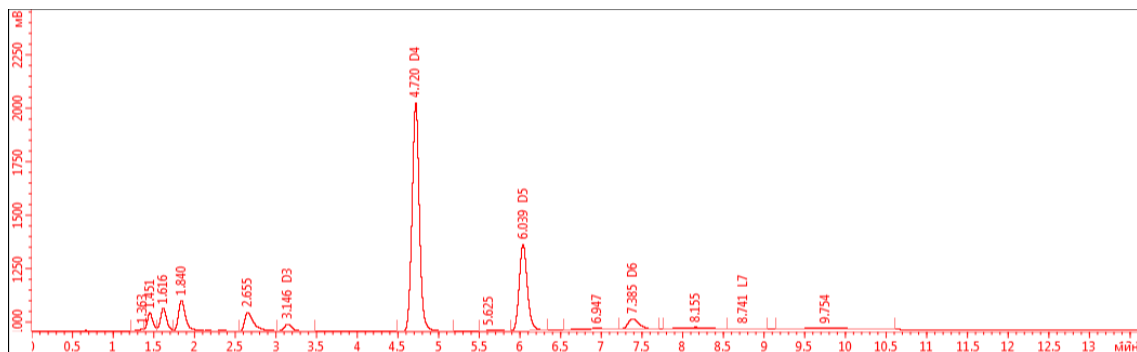

Fig S14. GC spectra of **6**

|    | <b>min</b> |         |          |
|----|------------|---------|----------|
|    | 1.363      | 0.49899 | 68.169   |
|    | 1.451      | 3.132   | 427.871  |
|    | 1.616      | 4.3269  | 591.121  |
|    | 1.840      | 7.3866  | 1009.116 |
|    | 2.655      | 5.2028  | 710.769  |
| D3 | 3.146      | 1.7017  | 232.473  |
| L3 | 0.000      | 0.000   | 0.000    |
| D4 | 4.720      | 48.98   | 6691.335 |
| L4 | 5.625      | 0.24967 | 34.108   |
| D5 | 6.039      | 20.395  | 2786.228 |
| L5 | 6.947      | 1.0259  | 140.157  |
| D6 | 7.385      | 3.3344  | 455.523  |
| D7 | 8.155      | 1.5072  | 205.909  |
| L7 | 8.741      | 0.29424 | 40.198   |
|    | 9.754      | 1.9648  | 268.420  |

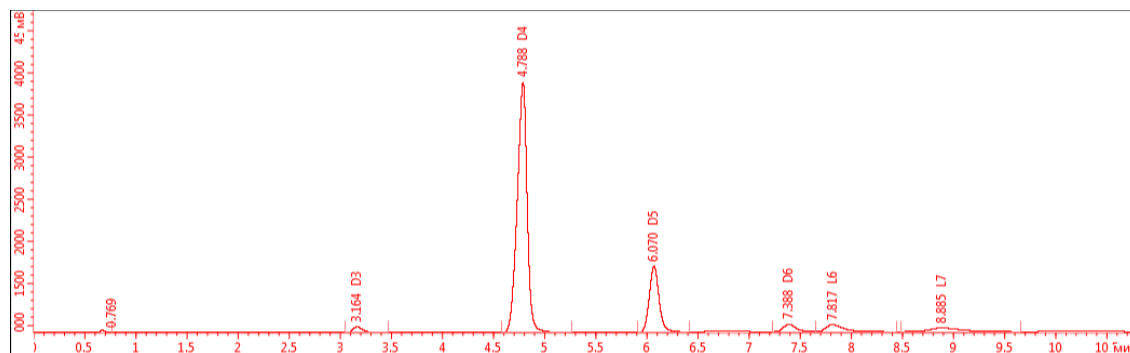

Fig S15. GC spectra of 7

| Component | Time, min | Concentration, % | Area      |
|-----------|-----------|------------------|-----------|
| D3        | 3.164     | 1.6413           | 467.863   |
| L3        | 0.000     | 0                | 0.000     |
| D4        | 4.788     | 70.266           | 20029.083 |
| L4        | 0.000     | 0                | 0.000     |
| D5        | 6.070     | 18.247           | 5201.285  |
| L5        | 0.000     | 0                | 0.000     |
| D6        | 7.388     | 2.6056           | 742.731   |
| L6        | 7.817     | 3.5755           | 1019.182  |
| D7        | 0.000     | 0                | 0.000     |
| L7        | 8.885     | 3.665            | 1044.697  |

| Component | Time, | Concentration. % | Area |
|-----------|-------|------------------|------|
|-----------|-------|------------------|------|

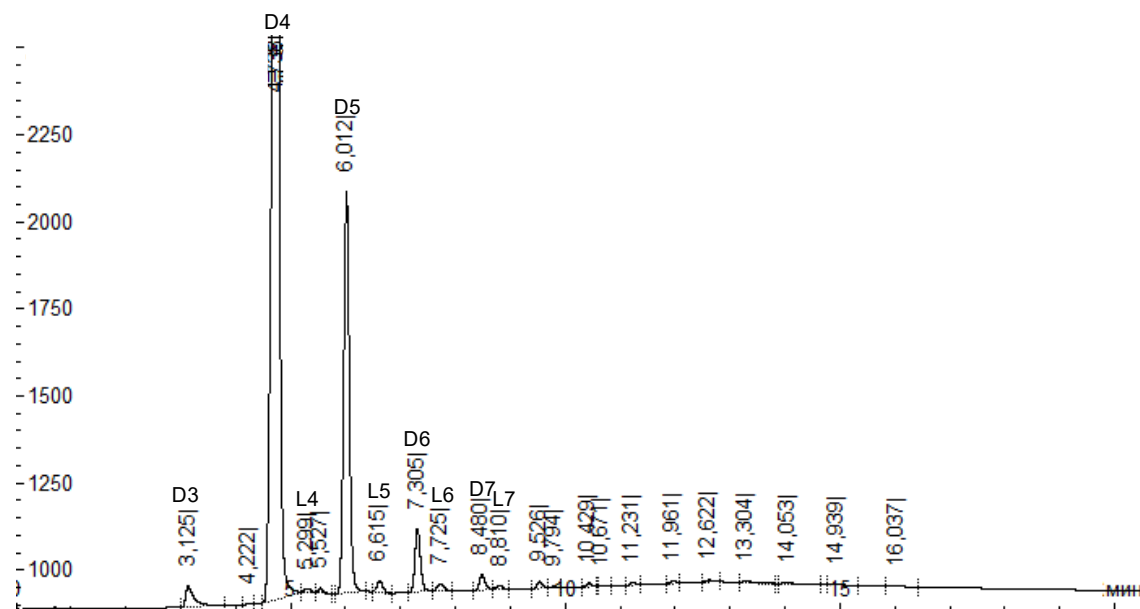

Fig S16. GC spectra of 8

|    | min    |        |           |
|----|--------|--------|-----------|
| D3 | 3.125  | 1.715  | 676.088   |
| L3 | 4.222  | 0.041  | 16.195    |
| D4 | 4.738  | 69.947 | 27577.284 |
| L4 | 5.299  | 0.206  | 81.298    |
|    | 5.527  | 0.229  | 90.138    |
| D5 | 6.012  | 20.962 | 8264.372  |
| L5 | 6.615  | 0.641  | 252.576   |
| D6 | 7.305  | 3.255  | 1283.441  |
| L6 | 7.725  | 0.475  | 187.359   |
| D7 | 8.480  | 0.782  | 308.266   |
| L7 | 8.810  | 0.239  | 94.372    |
| D8 | 9.526  | 0.346  | 136.376   |
| L8 | 9.794  | 0.069  | 27.377    |
| D9 | 10.429 | 0.202  | 79.629    |
| L9 | 10.671 | 0.034  | 13.555    |
|    | 11.231 | 0.127  | 50.010    |
|    | 11.961 | 0.099  | 38.859    |
|    | 12.622 | 0.111  | 43.928    |
|    | 13.304 | 0.146  | 57.441    |
|    | 14.053 | 0.139  | 54.692    |
|    | 14.939 | 0.129  | 50.980    |
|    | 16.037 | 0.107  | 42.000    |



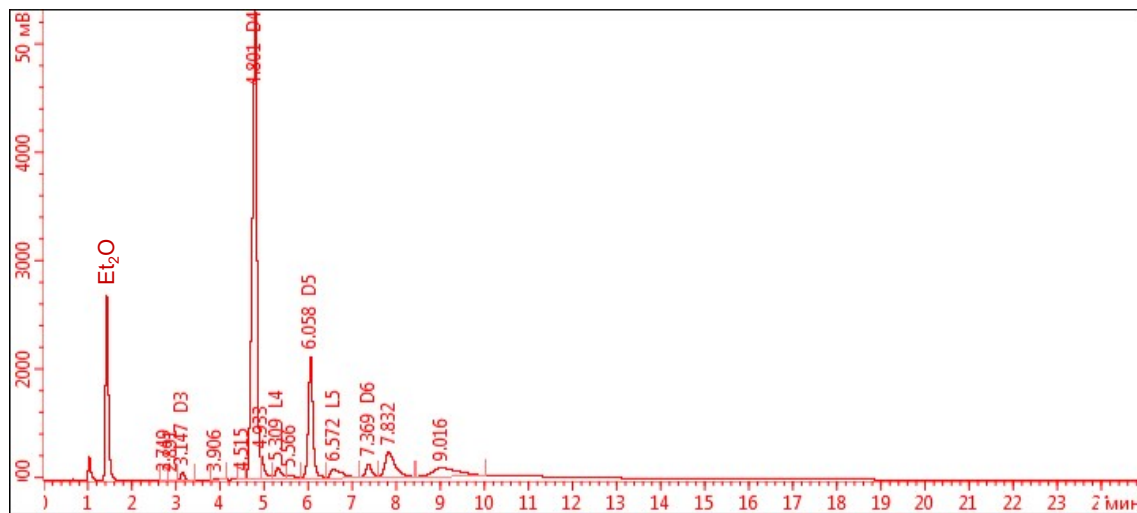

Fig S17. GC spectra of 9

| Component | Time, min | Concentration, % | Area      |
|-----------|-----------|------------------|-----------|
|           | 2.749     | 0.077256         | 41.116    |
|           | 2.891     | 0.085607         | 45.560    |
| D3        | 3.147     | 0.90481          | 481.541   |
| L3        | 3.906     | 0.2534           | 134.858   |
|           | 4.515     | 0.12066          | 64.216    |
| D4        | 4.801     | 59.916           | 31887.402 |
|           | 4.933     | 2.5943           | 1380.660  |
| L4        | 5.309     | 1.9678           | 1047.275  |
|           | 5.566     | 0.8213           | 437.095   |
| D5        | 6.058     | 15.519           | 8259.149  |
| L5        | 6.572     | 2.8392           | 1511.037  |
| D6        | 7.369     | 2.3327           | 1241.450  |
| L6        | 7.832     | 6.8592           | 3650.441  |
| L7        | 9.016     | 5.7086           | 3038.103  |

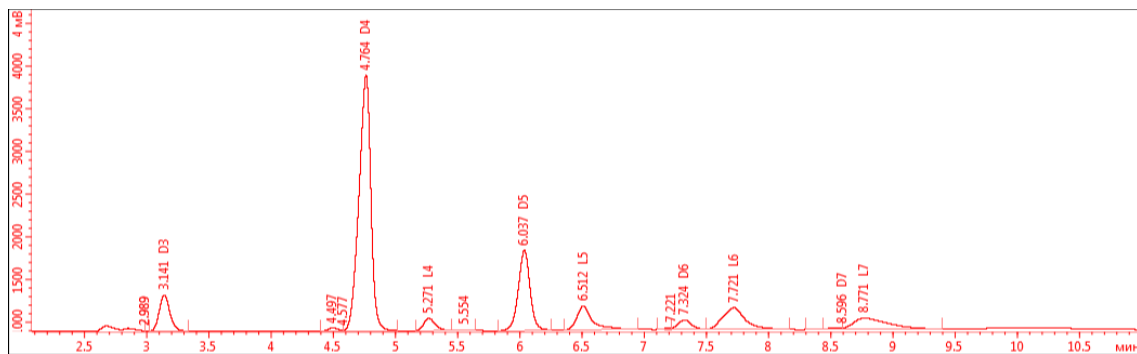

Fig S18. GC spectra of 10

| Component | Time, min | Concentration, % | Area      |
|-----------|-----------|------------------|-----------|
| D3        | 3.141     | 6.3813           | 2478.797  |
| L3        | 0.000     | 0.000            | 0.000     |
|           | 4.497     | 0.50419          | 195.853   |
| D4        | 4.764     | 51.181           | 19881.213 |
| L4        | 5.271     | 2.3305           | 905.268   |
|           | 5.554     | 0.1183           | 45.954    |
| D5        | 6.037     | 15.777           | 6128.550  |
| L5        | 6.512     | 6.1659           | 2395.132  |
|           | 7.221     | 0.19607          | 76.163    |
| D6        | 7.324     | 2.1386           | 830.733   |
| L6        | 7.721     | 8.1838           | 3178.961  |
| D7        | 8.596     | 0.3189           | 123.875   |
| L7        | 8.771     | 6.704            | 2604.144  |

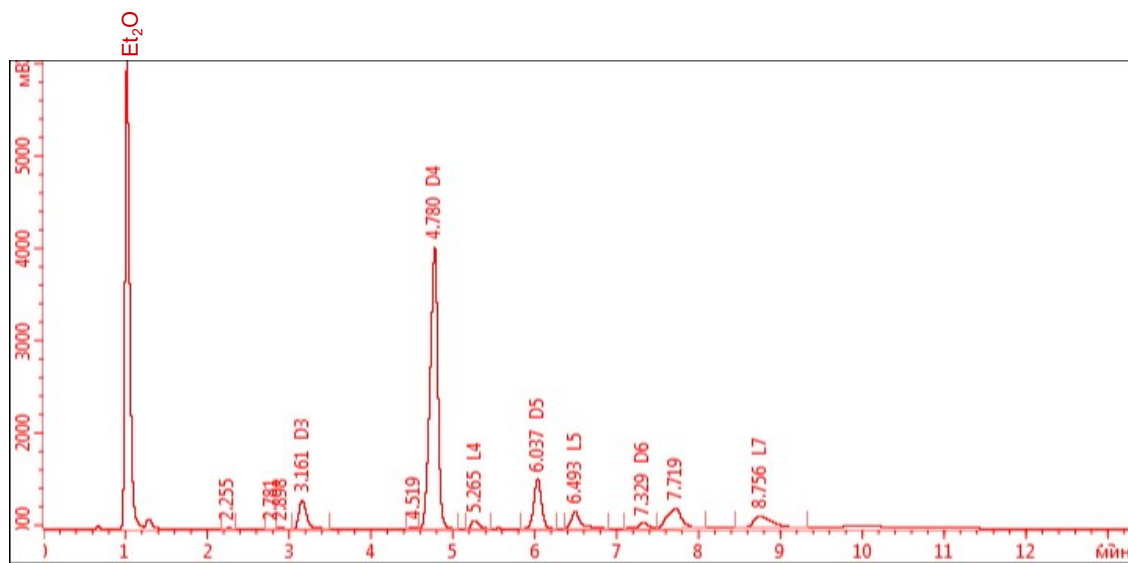

Fig S19. GC spectra of **11**

| Component | Time, min | Concentration, % | Area      |
|-----------|-----------|------------------|-----------|
|           | 2.255     | 0.20039          | 66.723    |
|           | 2.781     | 0.23228          | 77.339    |
|           | 2.898     | 0.34489          | 114.834   |
| D3        | 3.161     | 6.197            | 2063.356  |
| L3        | 0.000     | 0                | 0.000     |
|           | 4.519     | 0.33544          | 111.690   |
| D4        | 4.780     | 60.561           | 20164.681 |
| L4        | 5.265     | 1.6556           | 551.251   |
| D5        | 6.037     | 10.559           | 3515.881  |
| L5        | 6.493     | 4.3457           | 1446.948  |
| D6        | 7.329     | 1.4739           | 490.743   |
| L6        | 7.719     | 7.8474           | 2612.875  |
| L7        | 8.756     | 6.2467           | 2079.917  |

**SEC data**

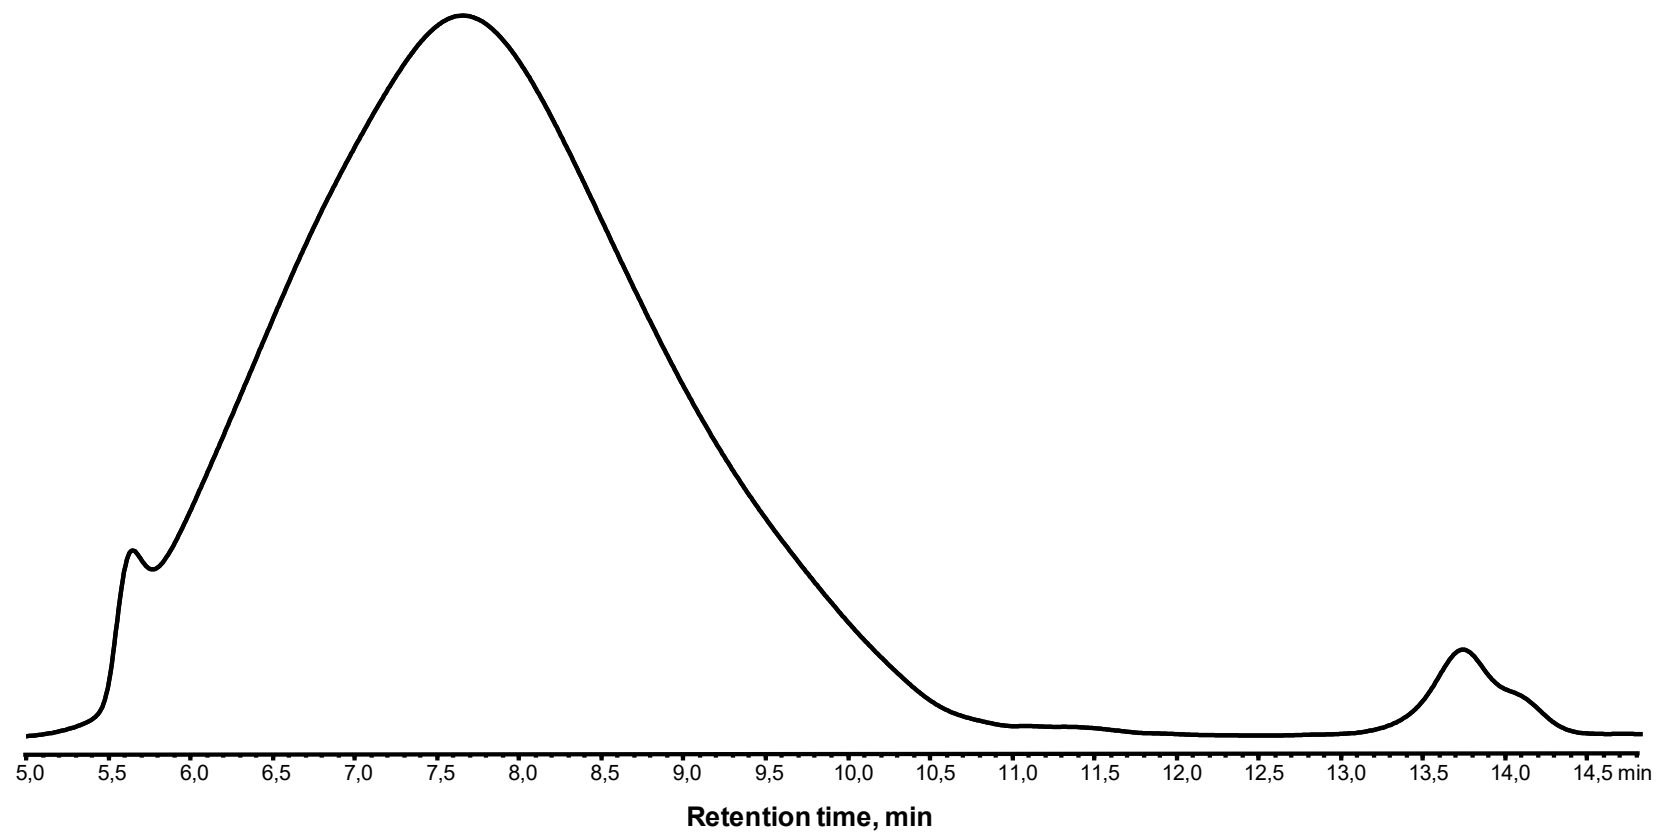

Fig S20. SEC curve of PMS-200

Table S3.

| <b>sample</b> | <b>Mp, kDa</b> | <b>Mn, kDa</b> | <b>Mw, kDa</b> | <b>PDI</b> | <b>Column size, Å</b> |
|---------------|----------------|----------------|----------------|------------|-----------------------|
| PMS-200 (I)   | 14.1           | 8.6            | 19.3           | 2.25       | 10 <sup>3</sup>       |

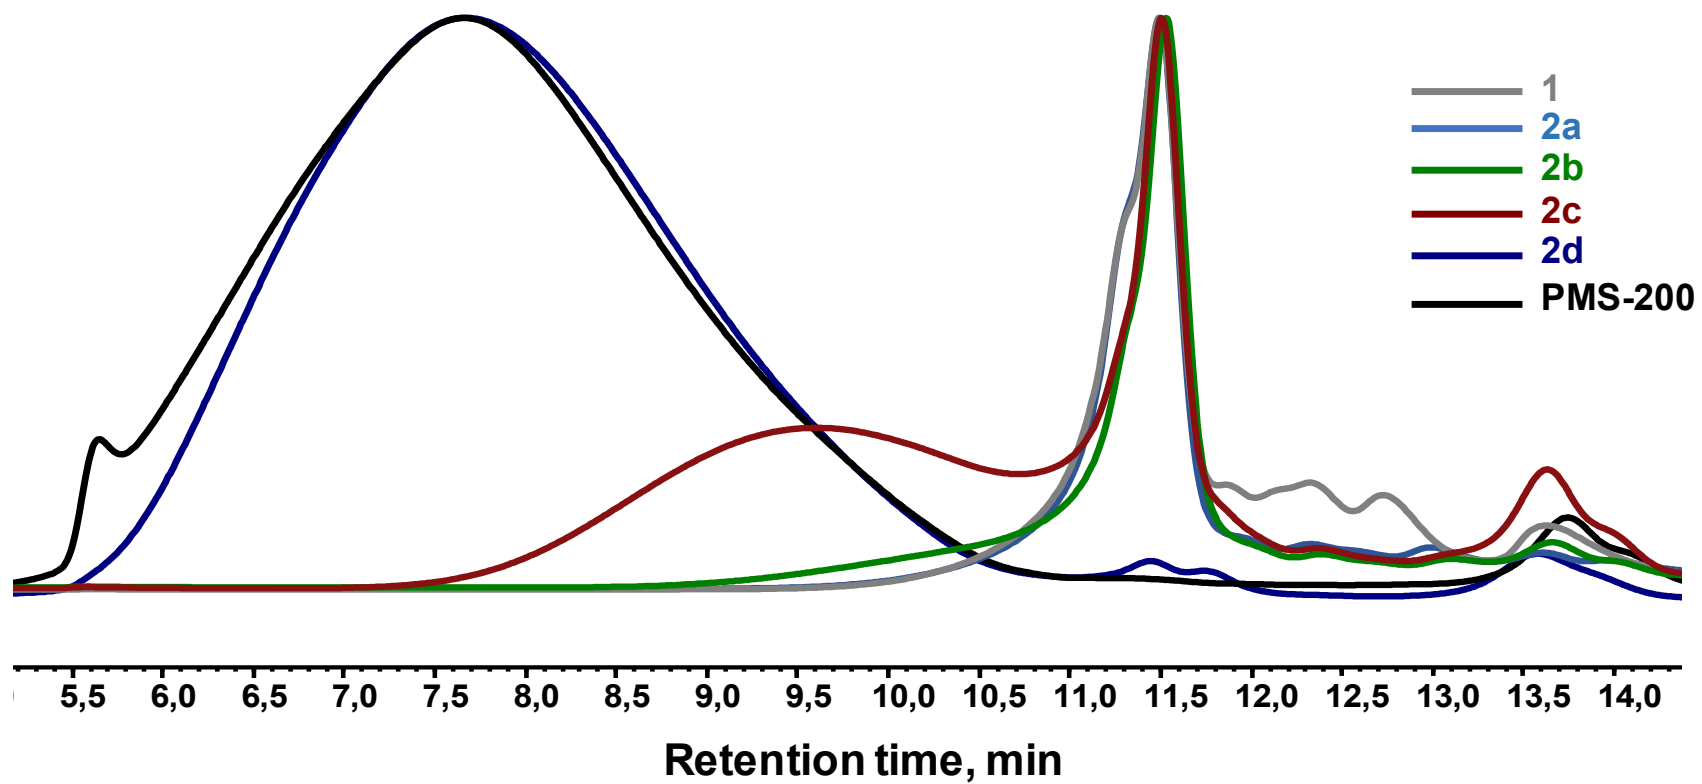

Fig S21. SEC curves of products 2a-2b after ammonia decomposition

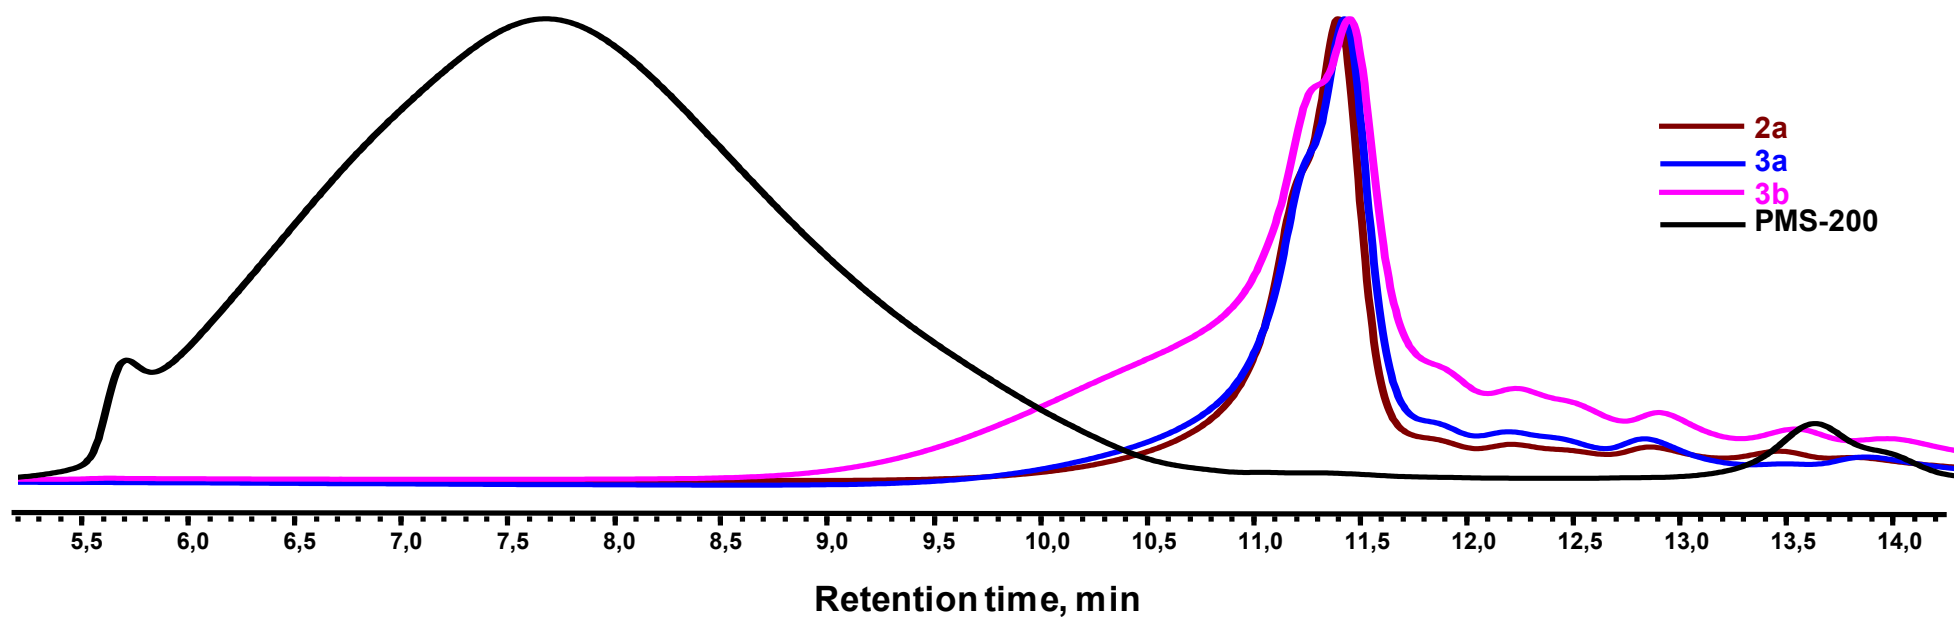

Fig S22. SEC curves of depolymerization products **3a** – **3b** after decompression

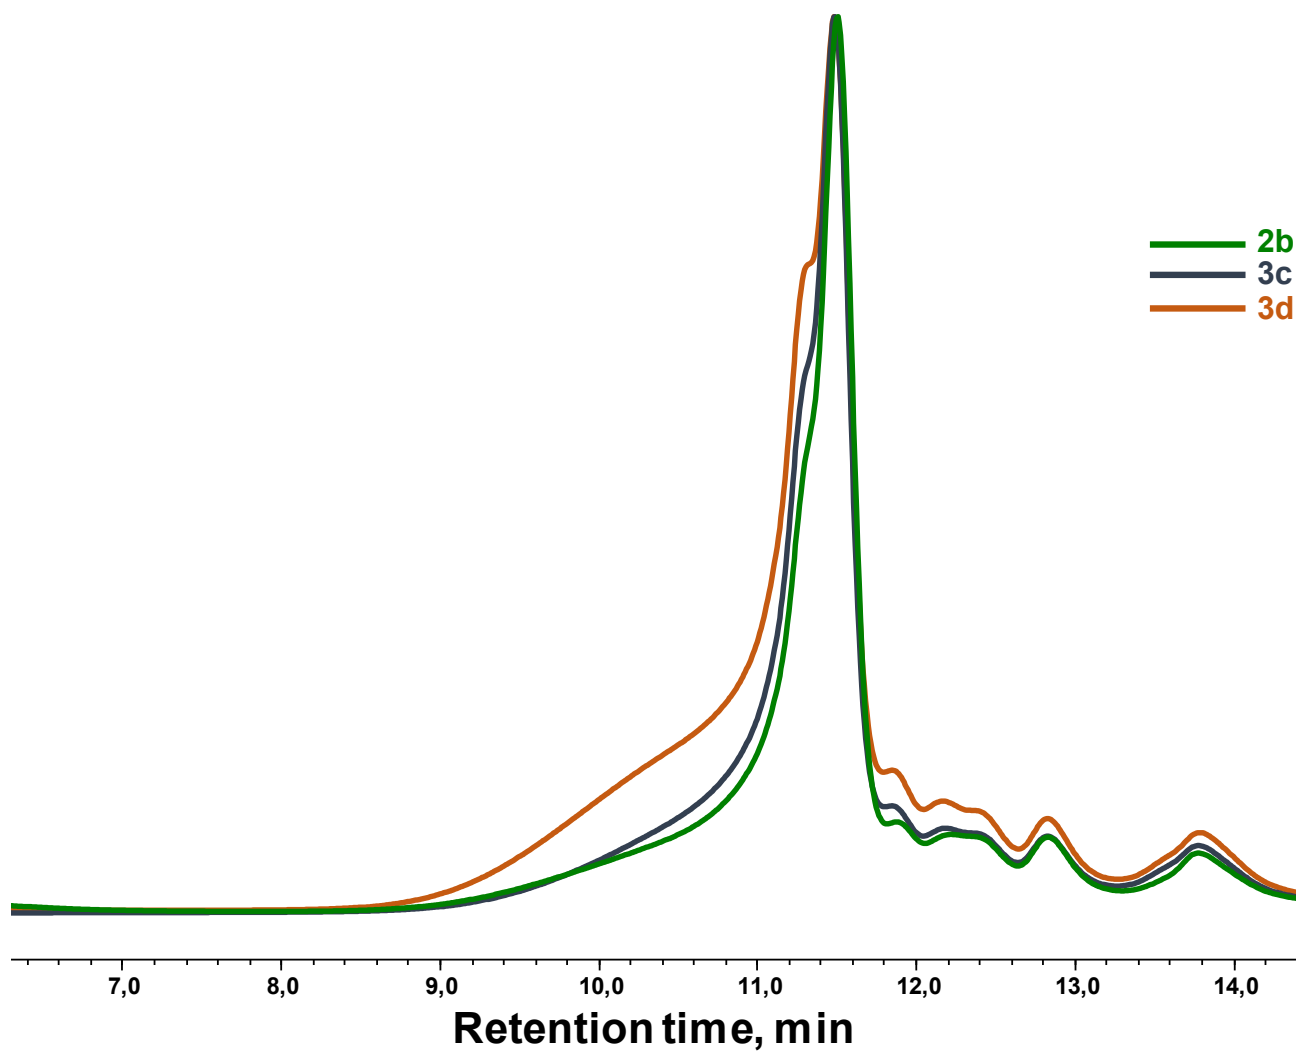

Fig S23. SEC curves of depolymerization products **3c** – **3d** after decompression

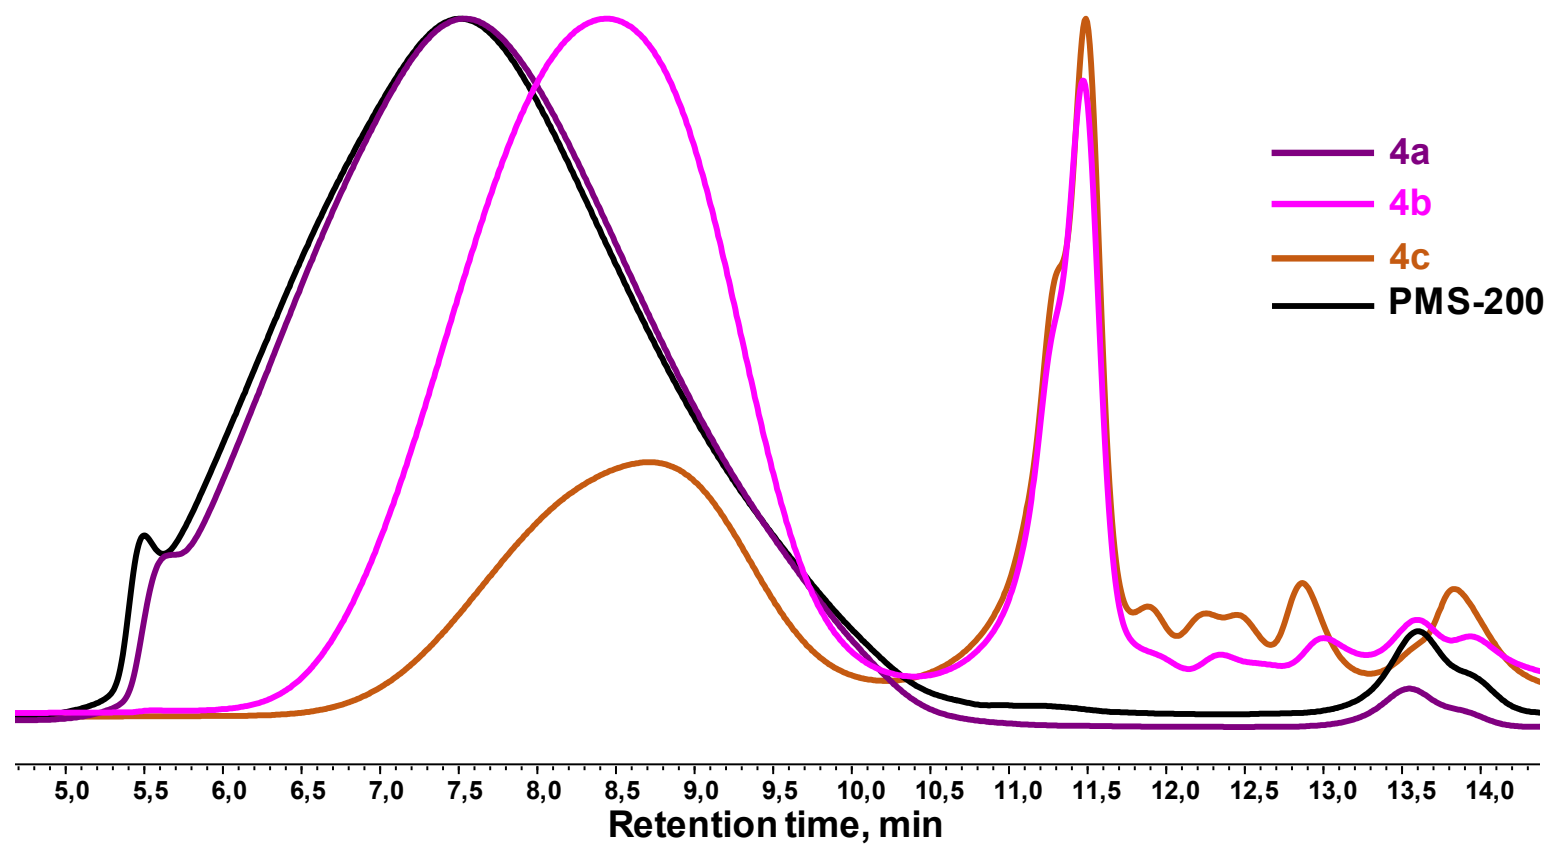

Fig S24. SEC curves of depolymerization products 4a – 4c after decompression



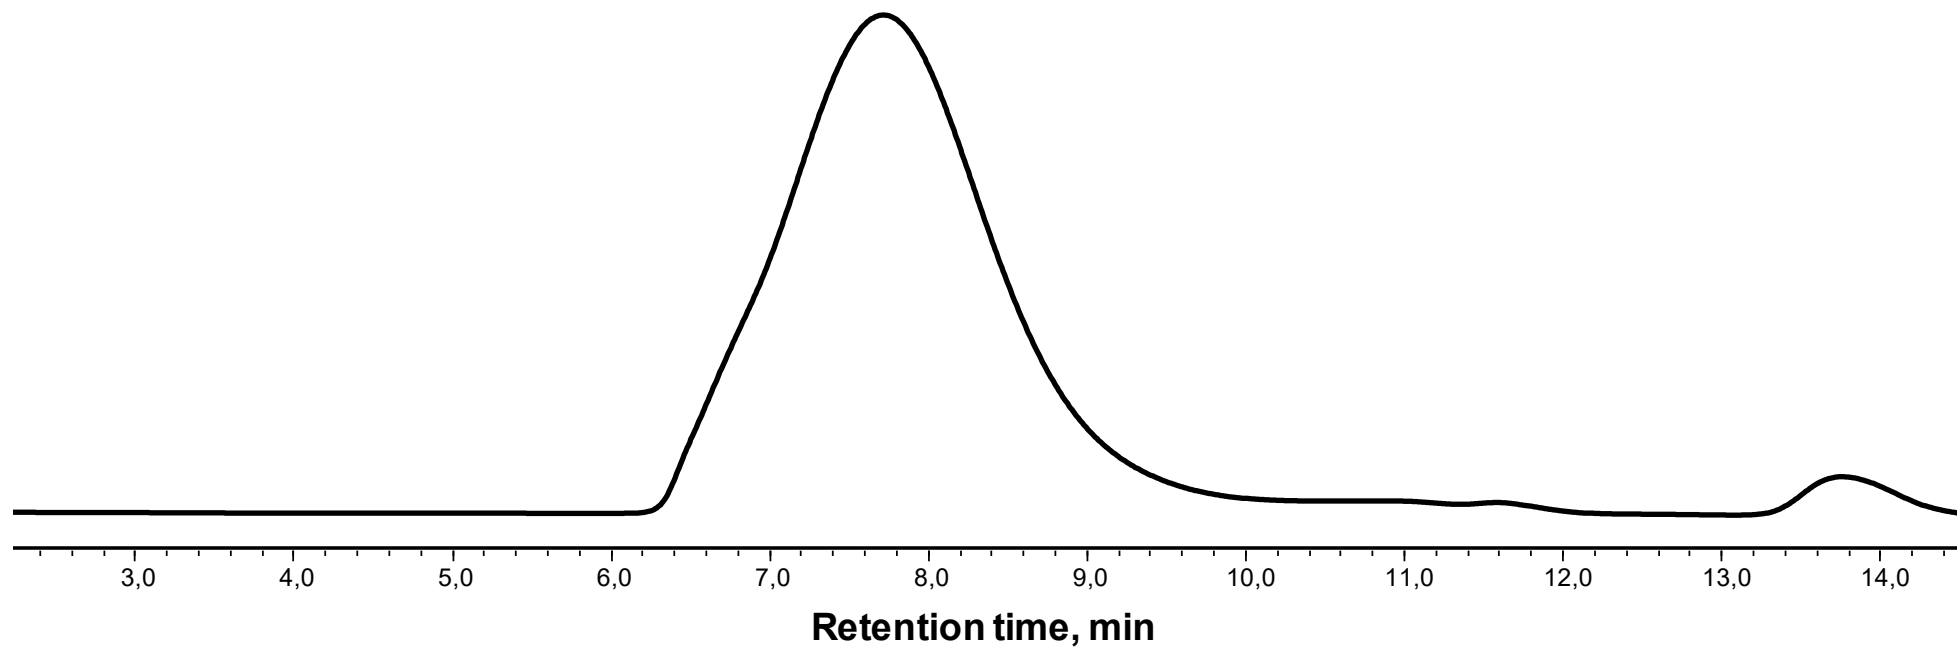

Fig S25. SEC curve of PDMS-(OH)<sub>2</sub>

Table S4.

| sample                      | Mp, kDa | Mn, kDa | Mw, kDa | PDI  | Column size, Å  |
|-----------------------------|---------|---------|---------|------|-----------------|
| PDMS-(OH) <sub>2</sub> (II) | 68.9    | 56.6    | 75.9    | 1.34 | 10 <sup>4</sup> |

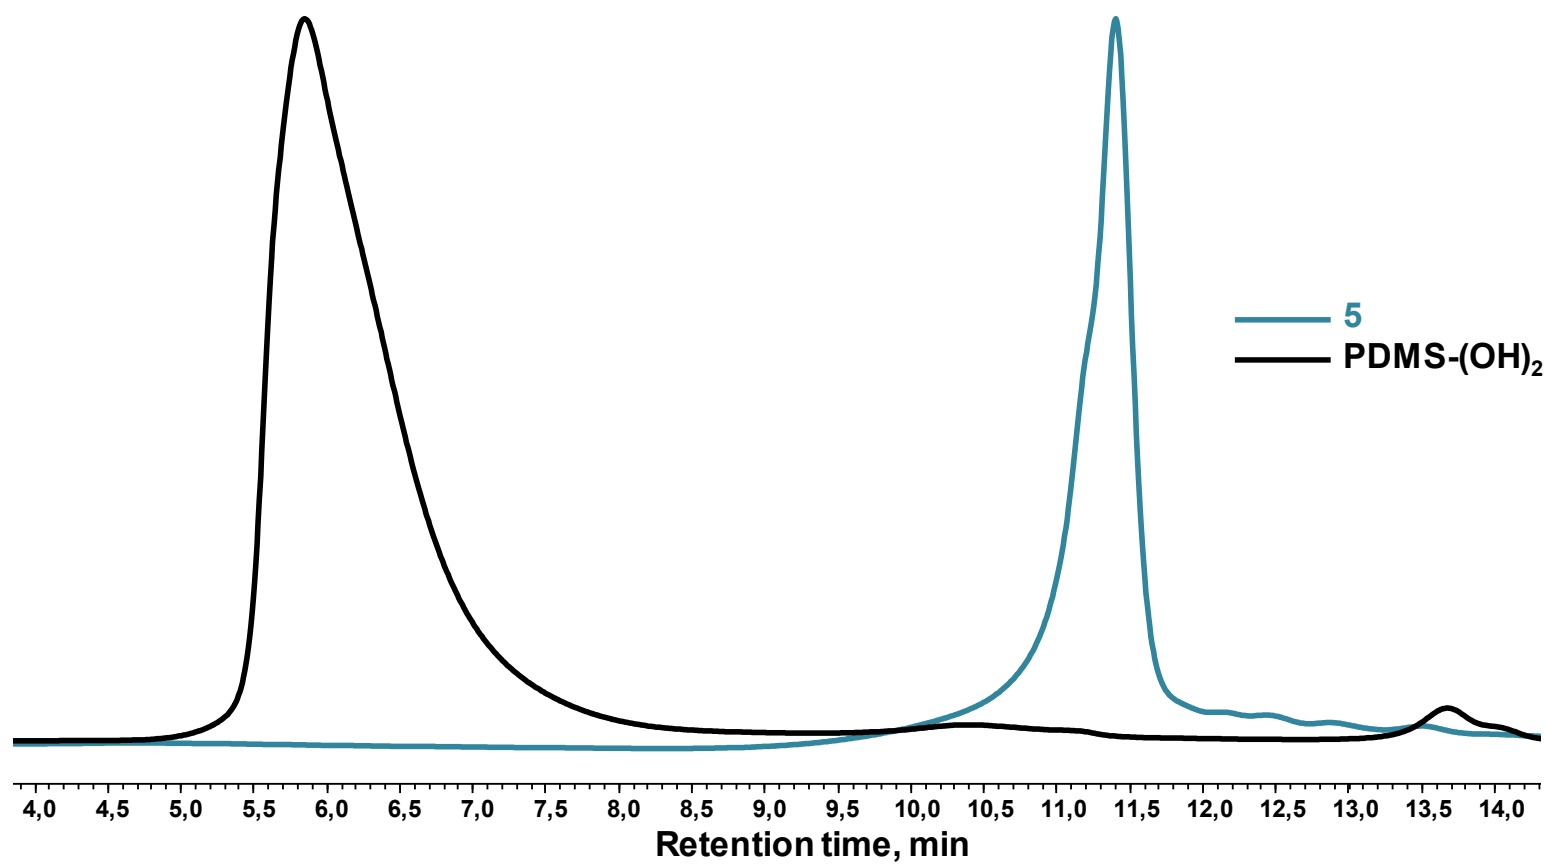

Fig S26. SEC curves of initial PDMS-(OH)<sub>2</sub> **II** and its depolymerization product **7** after ammonia decompression

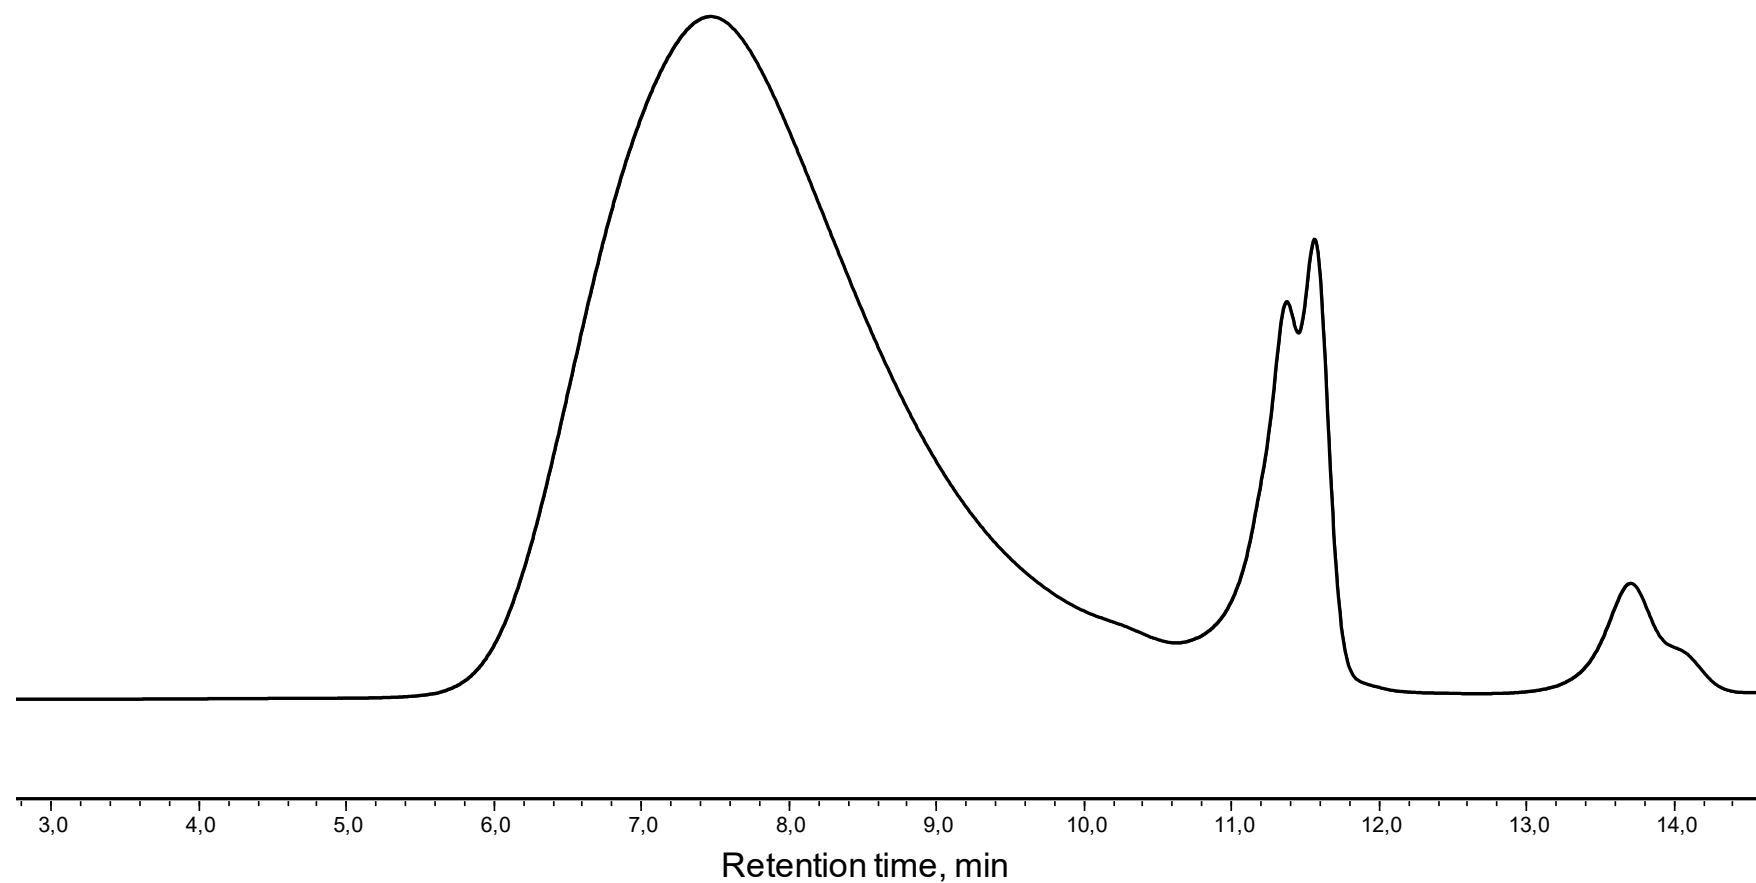

Fig S27. SEC curve of product 12

Table S5.

| sample | M <sub>p</sub> , kDa | M <sub>n</sub> , kDa | M <sub>w</sub> , kDa | PDI  | Column size, Å  |
|--------|----------------------|----------------------|----------------------|------|-----------------|
| 12     | 16.5                 | 8.4                  | 16.3                 | 1.95 | 10 <sup>3</sup> |

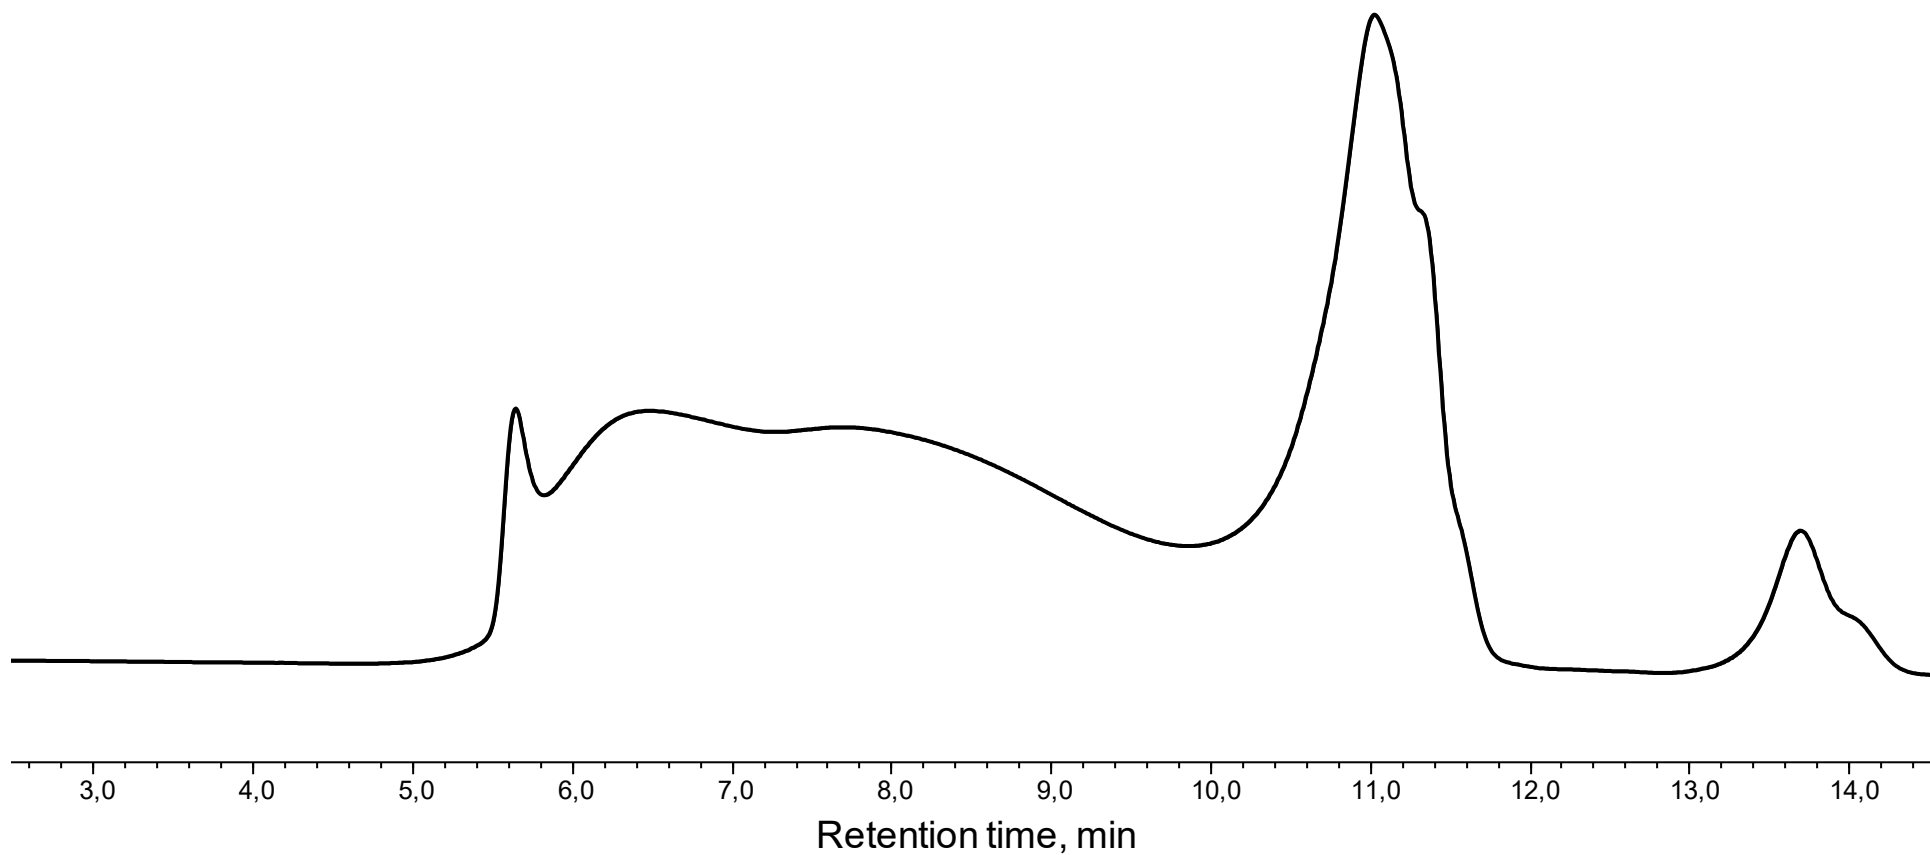

Fig S28. SEC curve of product 13

Table S6.

| sample | Mp, kDa | Mn, kDa | Mw, kDa | PDI  | Column size, Å  |
|--------|---------|---------|---------|------|-----------------|
| 13     | 79.6    | 9.6     | 24.5    | 2.56 | 10 <sup>3</sup> |

## NMR data

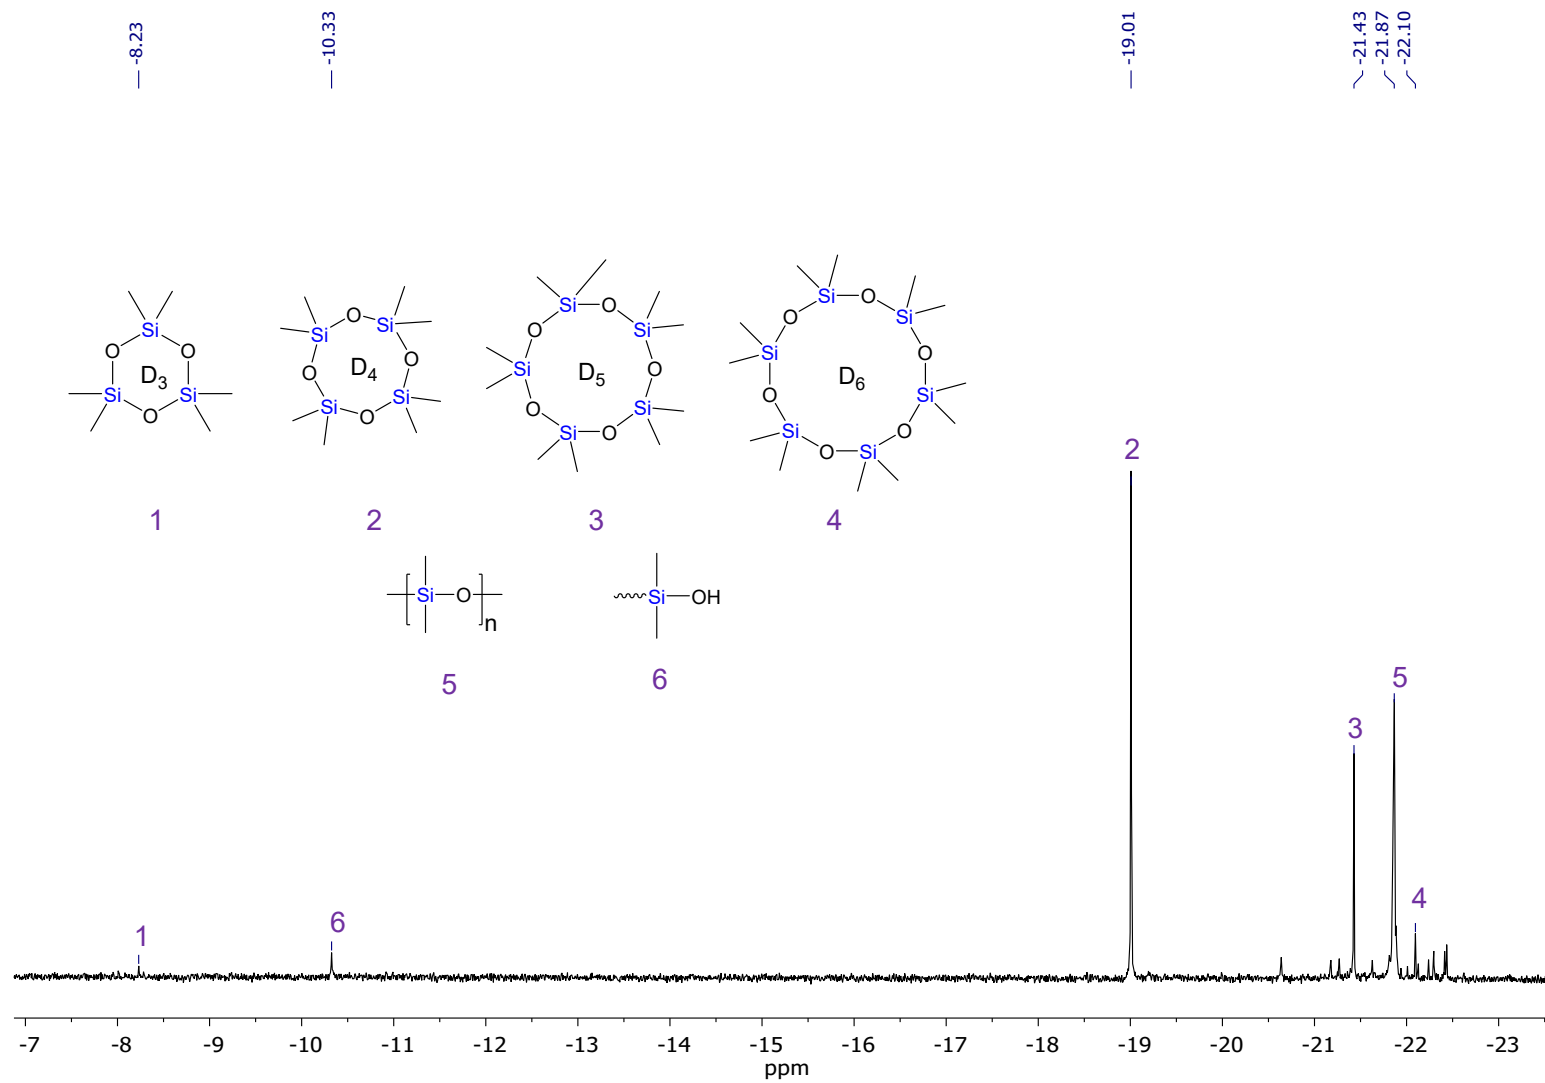

Fig S29.  $^{29}\text{Si}$  NMR spectrum of 6

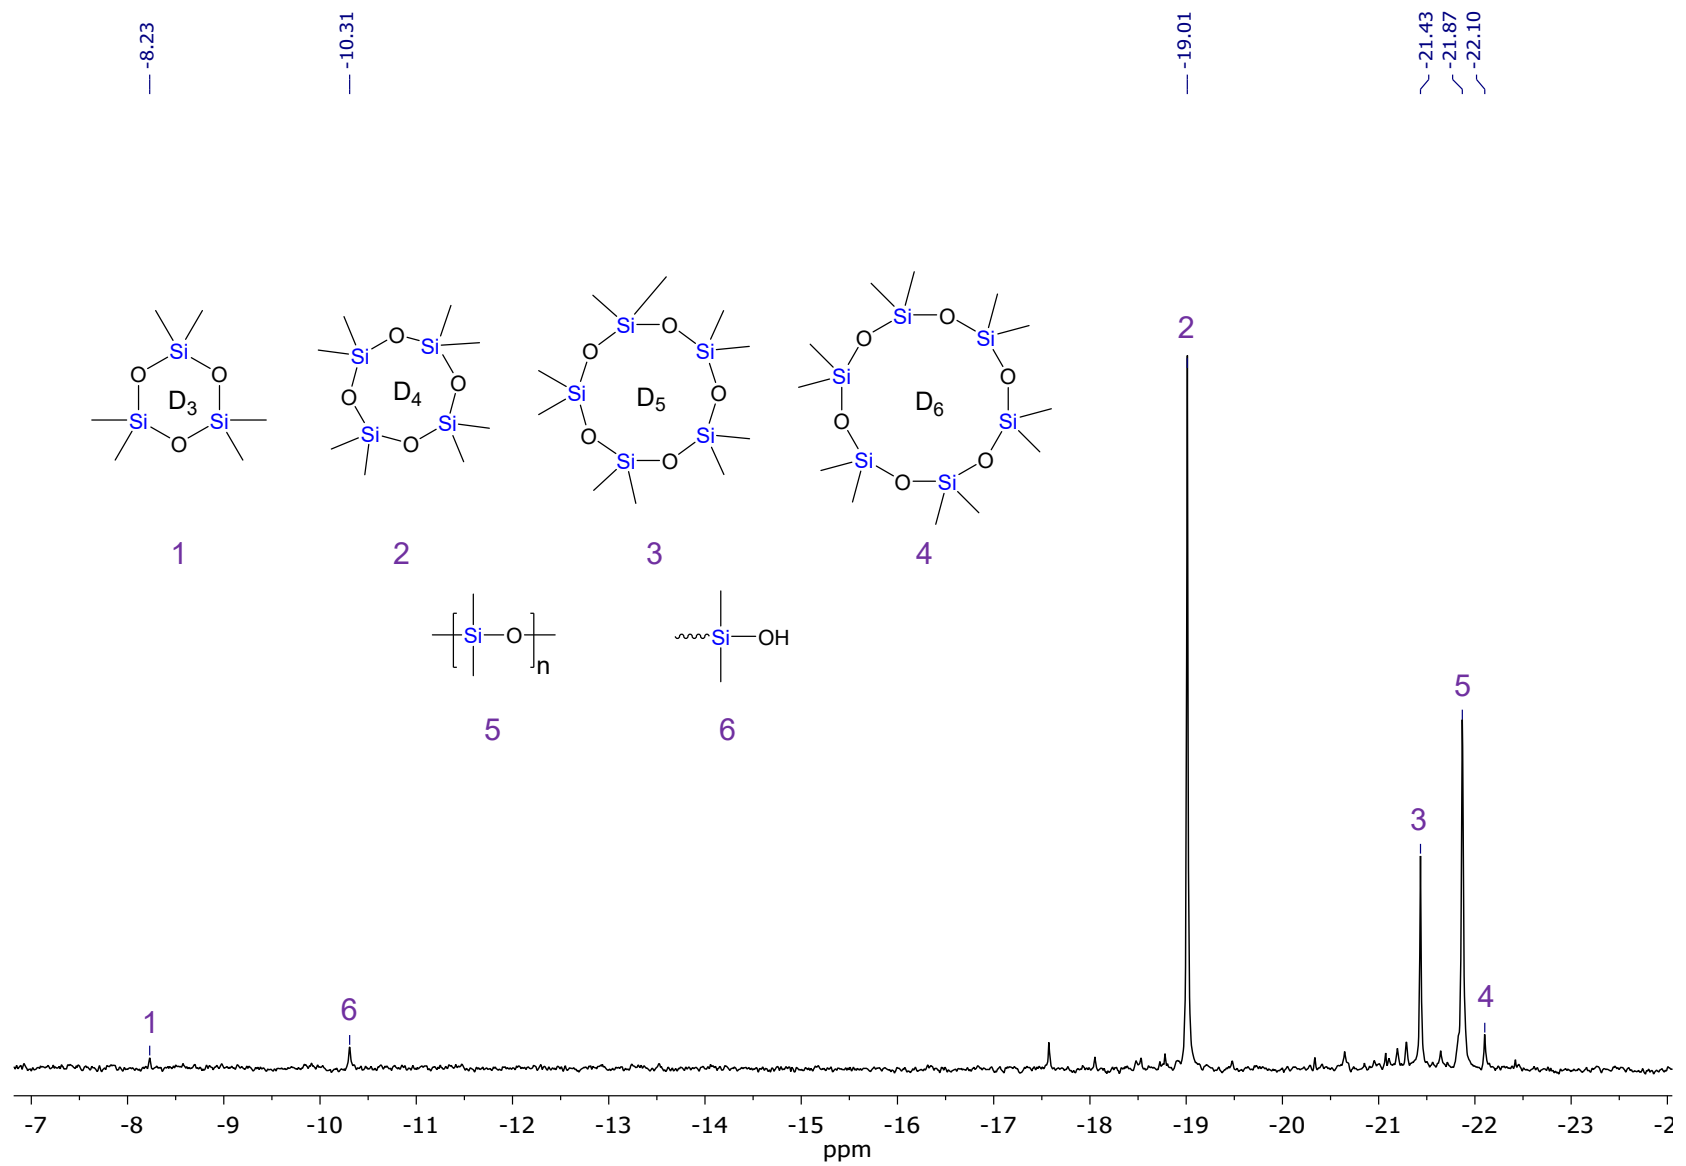

Fig S30.  $^{29}\text{Si}$  NMR spectrum of 7

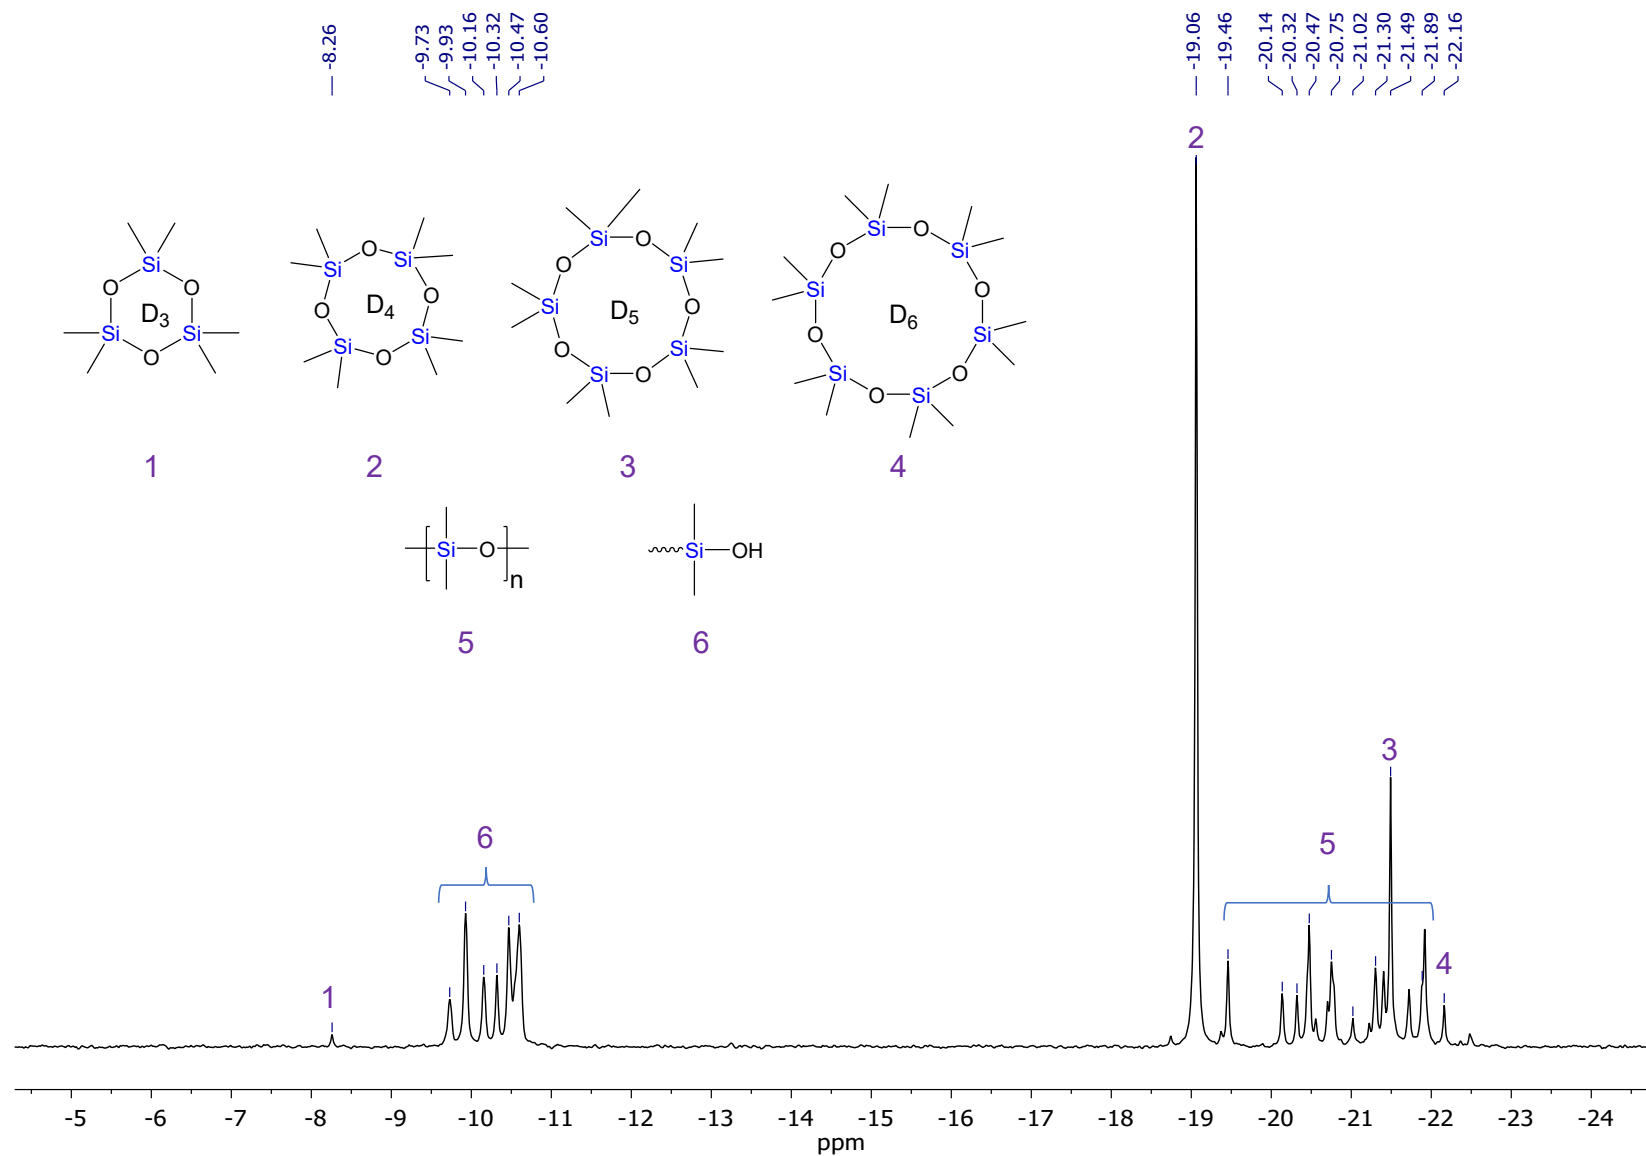

Fig S31.  $^{29}\text{Si}$  NMR spectrum of **8**

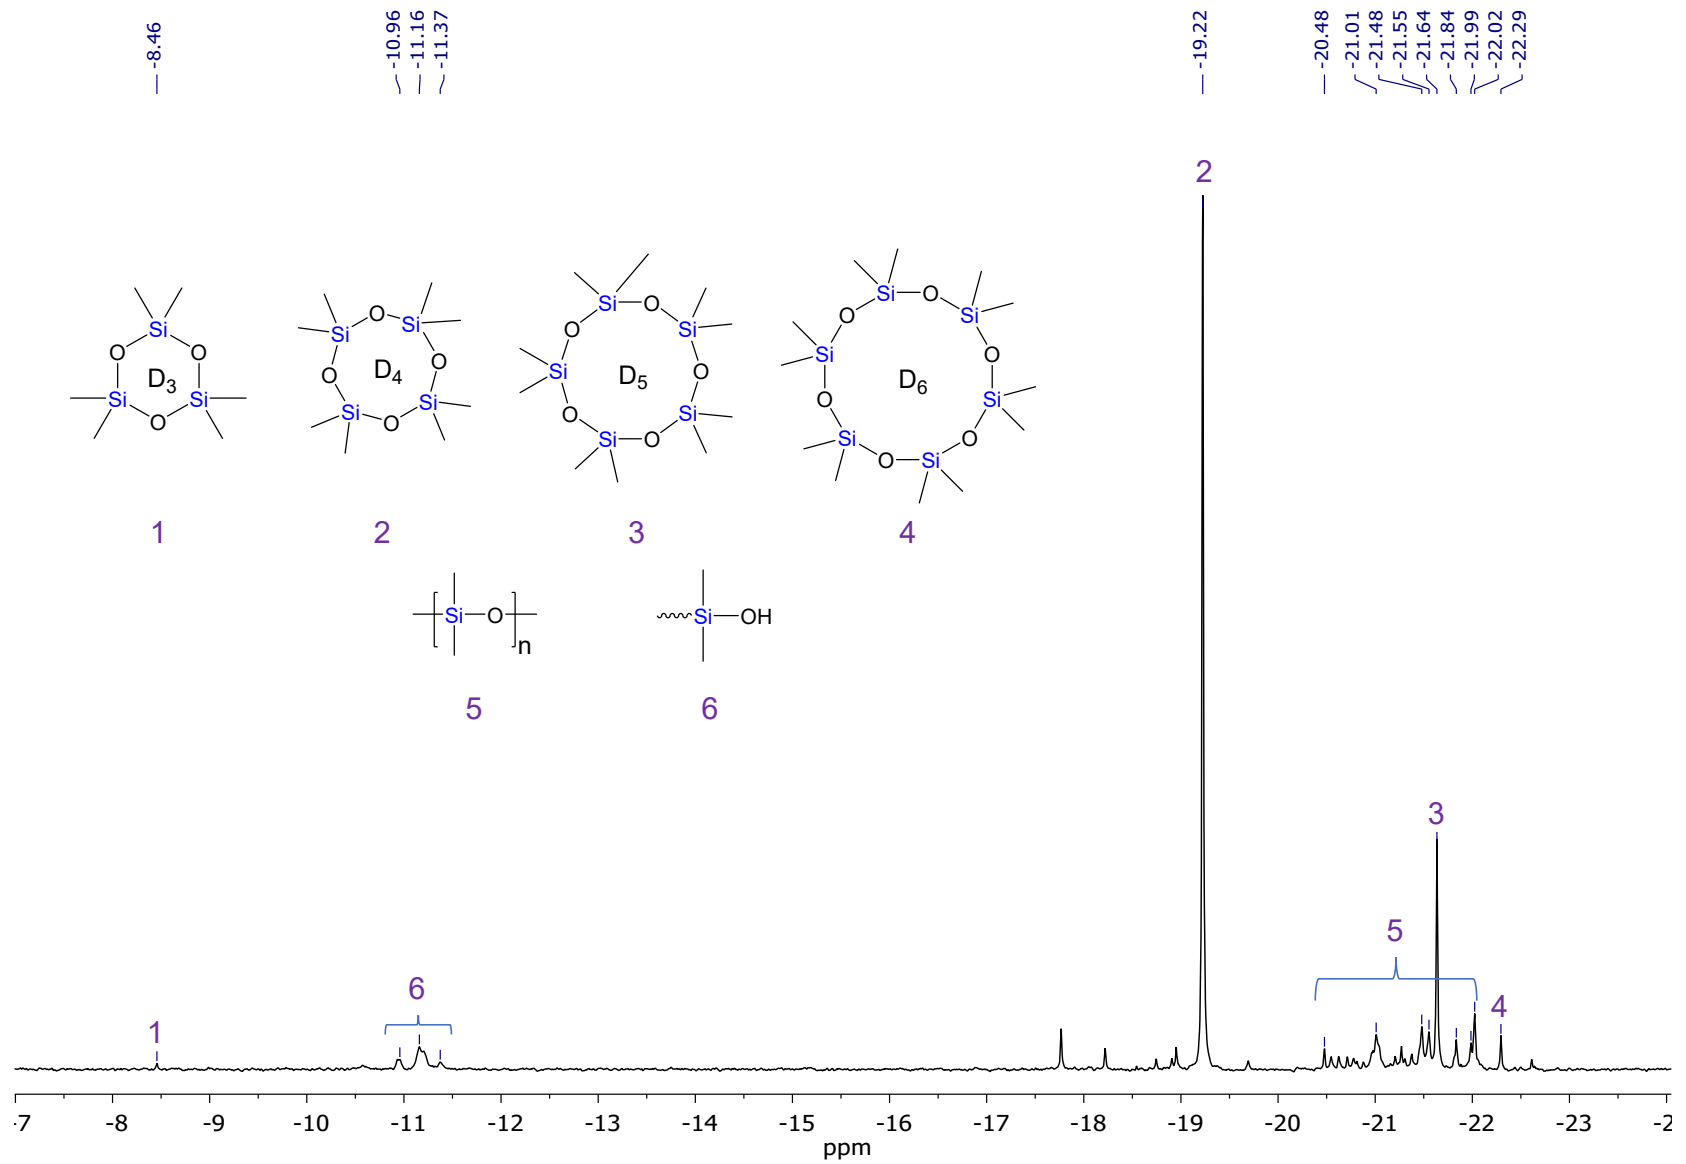

Fig S32. <sup>29</sup>Si NMR spectrum of **9**



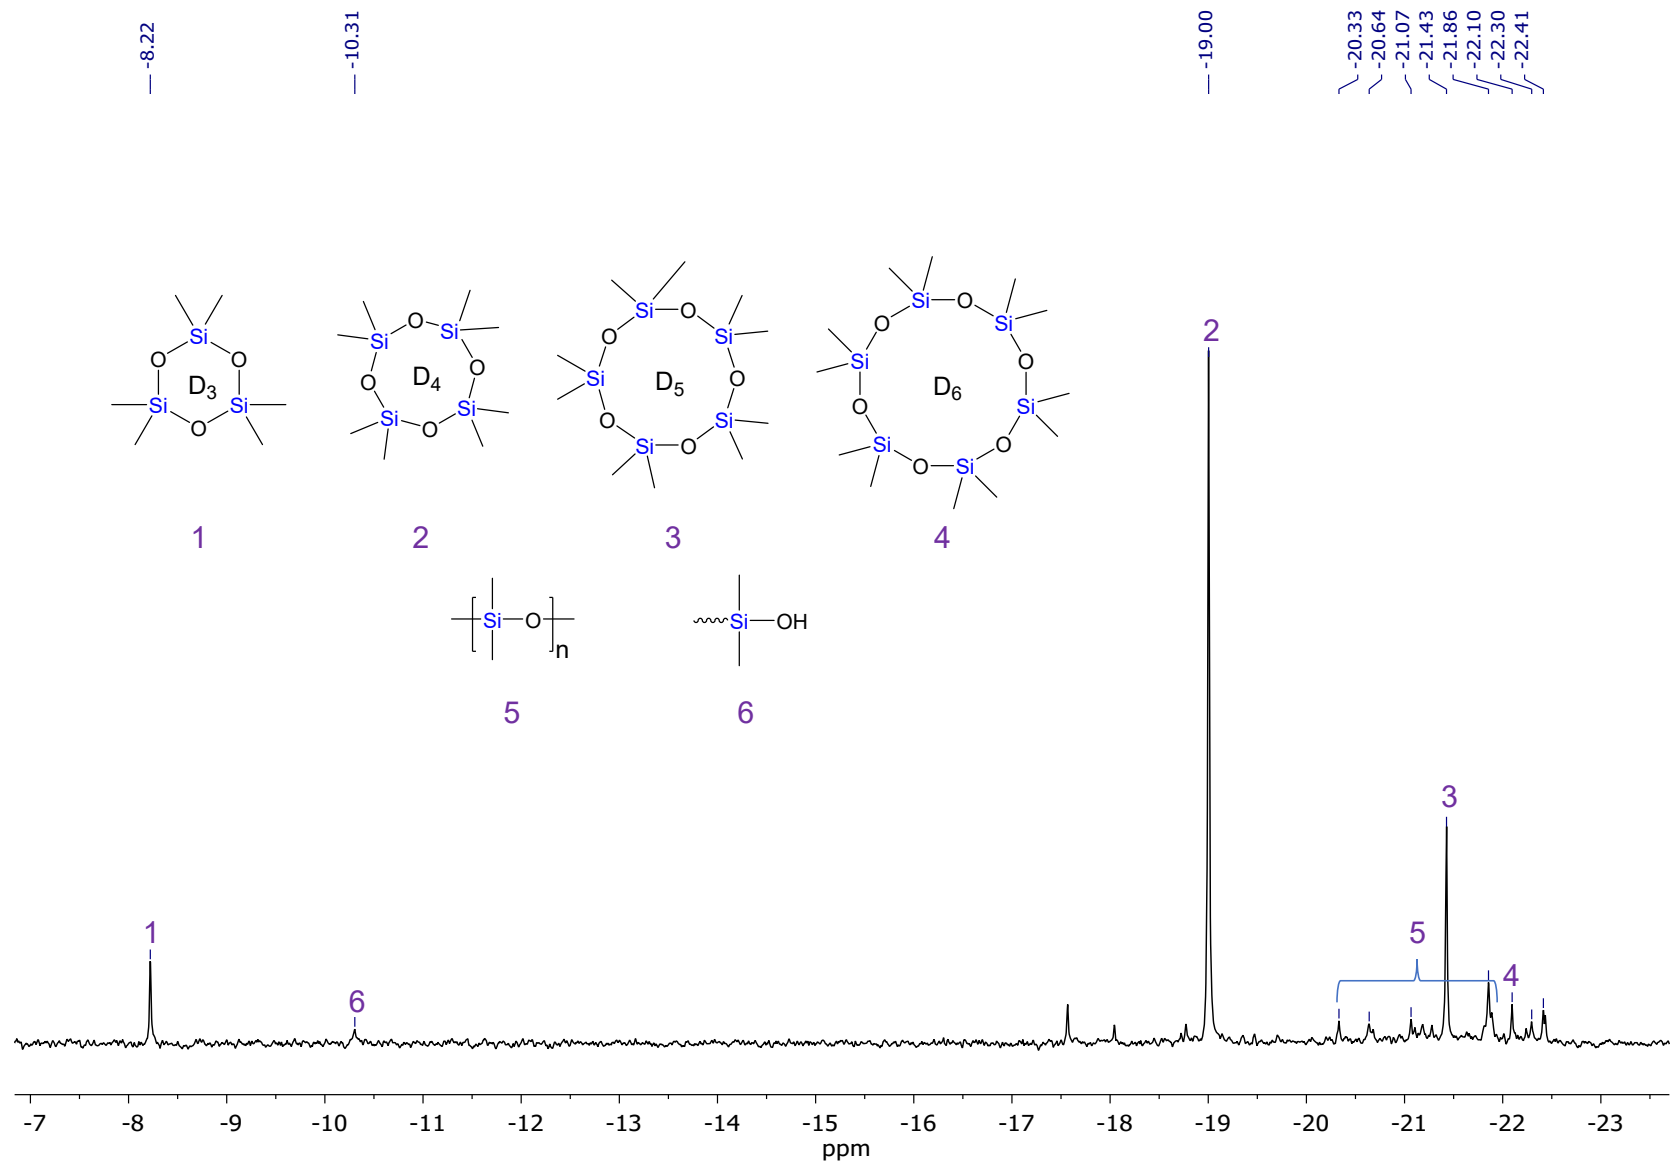

Fig S33.  $^{29}\text{Si}$  NMR spectrum of **10**

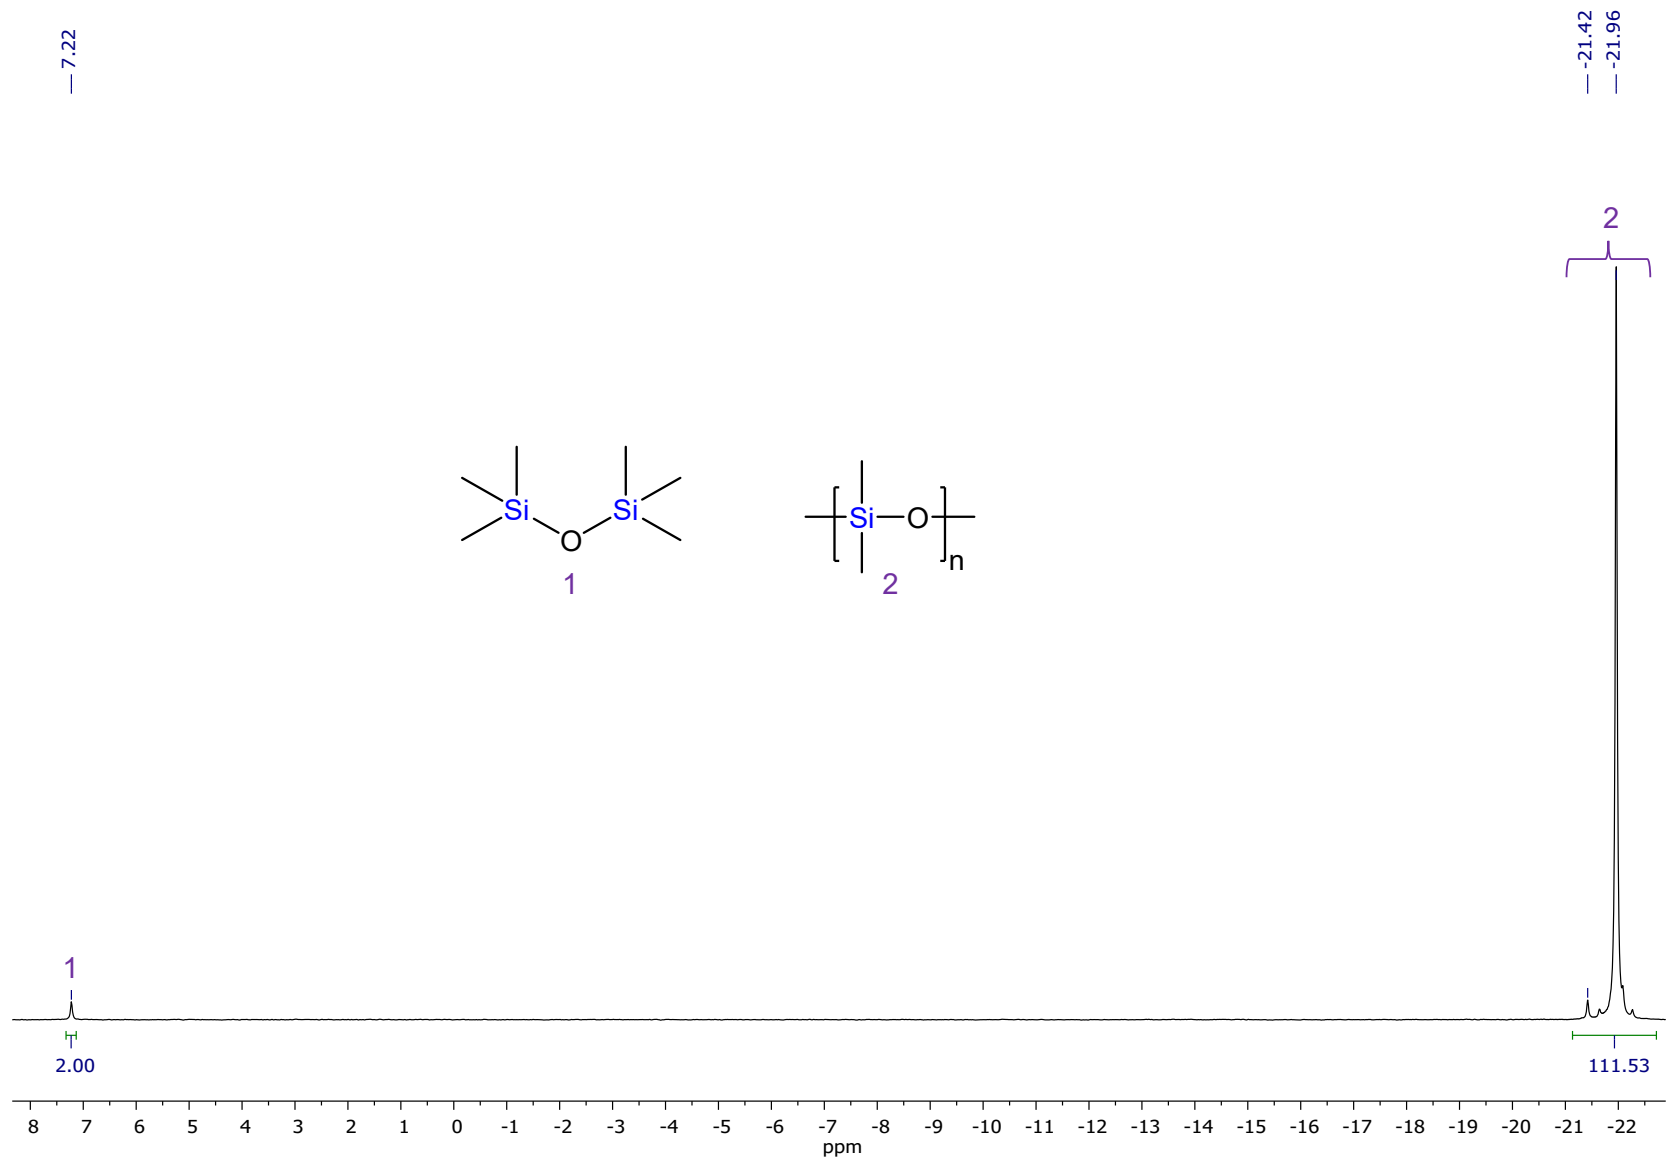

Fig S34.  $^{29}\text{Si}$  ( $\text{CDCl}_3/\text{Cr}(\text{C}_5\text{H}_8\text{O}_2)_3$ ) NMR spectrum of **PMS-200**

**Photo**

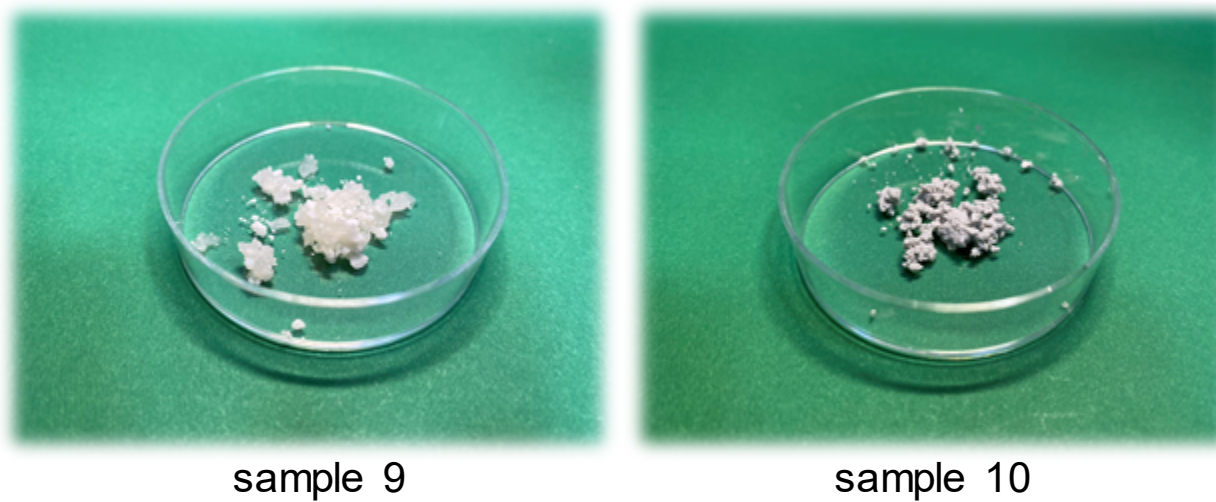

Fig S35. Photographs of depolymerization products of silicone industrial waste after ammonia decompression

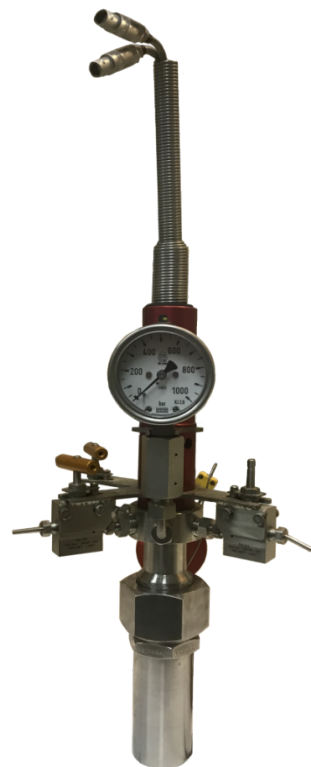

Fig S36. Autoclave for scaling the depolymerization process
